## Genome-wide association and functional studies identify 46 novel loci for alcohol consumption and suggest common genetic mechanisms with neuropsychiatric disorders

Evangelos Evangelou<sup>1,2\*</sup>, He Gao<sup>1,3\*</sup>, Congying Chu<sup>4\*</sup>, Georgios Ntritsos<sup>2\*</sup>, Paul Blakeley<sup>1,5</sup>, Andrew R Butts<sup>6</sup>, Raha Pazoki<sup>1</sup>, Hideaki Suzuki<sup>7,8</sup>, Fotios Koskeridis<sup>2</sup>, Andrianos M Yiorkas<sup>9,10</sup>, Ibrahim Karaman<sup>1,11</sup>, Joshua Elliott<sup>1</sup>, Stefanie Aeschbacher<sup>12</sup>, Traci M Bartz<sup>13,14</sup>, Sebastian E Baumeister<sup>15,16</sup>, Peter S Braund<sup>17,18</sup>, Michael R Brown<sup>19</sup>, Jennifer A Brody<sup>13</sup>, Toni-Kim Clarke<sup>20</sup>, Niki Dimou<sup>2</sup>, Jessica D Faul<sup>21</sup>, Georg Homuth<sup>22</sup>, Anne U Jackson<sup>23</sup>, Katherine A Kentistou<sup>24,25</sup>, Peter K Joshi<sup>24</sup>, Rozenn N Lemaitre<sup>13</sup>, Penelope A Lind<sup>26</sup>, Leo-Pekka Lyytikäinen<sup>27-29</sup>, Massimo Mangino<sup>30,31</sup>, Yuri Milaneschi<sup>32</sup>, Christopher P Nelson<sup>17,18</sup>, Ilja M Nolte<sup>33</sup>, Mia-Maria Perälä<sup>34,35</sup>, Ozren Polasek<sup>36</sup>, David Porteous<sup>37,38</sup>, Scott M Ratliff<sup>39</sup>, Jennifer A Smith<sup>21,39</sup>, Alena Stančáková<sup>40</sup>, Alexander Teumer<sup>15,41</sup>, Samuli Tuominen<sup>42</sup>, Sébastien Thériault<sup>43,44</sup>, Jagadish Vangipurapu<sup>40</sup>, John B Whitfield<sup>45</sup>, Alexis Wood<sup>46</sup>, Jie Yao<sup>47</sup>, Bing Yu<sup>19</sup>, Wei Zhao<sup>39</sup>, Dan E Arking<sup>48</sup>, Juha Auvinen<sup>49,50</sup>, Chunyu Liu<sup>51</sup>, Minna Männikkö<sup>52</sup>, Lorenz Risch<sup>53-55</sup>, Jerome I Rotter<sup>56</sup>, Harold Snieder<sup>33</sup>, Juha Veijola<sup>57-59</sup>, Alexandra I Blakemore<sup>9,10</sup>, Michael Boehnke<sup>23</sup>, Harry Campbell<sup>24</sup>, David Conen<sup>43</sup>, Johan G Eriksson<sup>60-62</sup>, Hans J Grabe<sup>63,64</sup>, Xiuqing Guo<sup>47</sup>, Pim van der Harst<sup>65-67</sup>, Catharina A Hartman<sup>68</sup>, Caroline Hayward<sup>69</sup>, Andrew C Heath<sup>70</sup>, Marjo-Riitta Jarvelin<sup>71-75</sup>, Mika Kähönen<sup>76,77</sup>, Sharon LR Kardina<sup>39</sup>, Michael Kühne<sup>12</sup>, Johanna Kuusisto<sup>78</sup>, Markku Laakso<sup>78</sup>, Jari Lahti<sup>42</sup>, Terho Lehtimäki<sup>27,28</sup>, Andrew M McIntosh<sup>20,38</sup>, Karen L Mohlke<sup>79</sup>, Alanna C Morrison<sup>19</sup>, Nicholas G Martin<sup>45</sup>, Albertine J Oldehinkel<sup>68</sup>, Brenda WJH Penninx<sup>32</sup>, Bruce M Psaty<sup>80,81</sup>, Olli T Raitakari<sup>82,83</sup>, Igor Rudan<sup>24</sup>, Nilesh J Samani<sup>17,18</sup>, Laura J Scott<sup>23</sup>, Tim D Spector<sup>30</sup>, Niek Verweij<sup>65</sup>, David R Weir<sup>21</sup>, James F Wilson<sup>24,69</sup>, Daniel Levy<sup>84,85</sup>, Ioanna Tzoulaki<sup>1-3</sup>, Jimmy D Bell<sup>86\*</sup>, Paul Matthews<sup>7,11\*</sup>, Adrian Rothenfluh<sup>6,87\*</sup>, Sylvane Desrivieres<sup>4\*</sup>, Gunter Schumann<sup>4\*‡</sup>, Paul Elliott<sup>1,3,11,88,89\*‡</sup>

\* Equal contribution

‡ Corresponding authors

1. Department of Epidemiology and Biostatistics, Imperial College London, London, UK.
2. Department of Hygiene and Epidemiology, University of Ioannina Medical School, Ioannina, Greece.
3. MRC-PHE Centre for Environment and Health, Imperial College London, London, UK.
4. Medical Research Council-Social, Genetic and Developmental Psychiatry Centre, Institute of Psychiatry, Psychology & Neuroscience, King's College London, London SE5 8AF, United Kingdom.
5. NIHR Imperial Biomedical Research Centre, ITMAT Data Science Group, Imperial College London, UK.
6. Molecular Medicine; School of Medicine; University of Utah, Salt Lake City, UT.

7. Centre for Restorative Neurosciences, Division of Brain Sciences, Department of Medicine, Hammersmith Campus, Imperial College London, Du Cane Road, London, W12 0NN, UK.
8. Tohoku Medical Megabank Organization, Tohoku University, 2-1 Seiryō, Aoba, Sendai, 980-8573, Japan.
9. Department of Life Sciences, Brunel University London, London, UK.
10. Section of Investigative Medicine, Imperial College London, London, UK.
11. UK Dementia Research Institute, Imperial College London, London, United Kingdom.
12. Cardiology Division, University Hospital Basel, 4031 Basel, Switzerland.
13. Cardiovascular Health Research Unit, Department of Medicine, University of Washington, Seattle, Washington, USA.
14. Department of Biostatistics, University of Washington, Seattle, WA, USA.
15. Institute for Community Medicine, University Medicine Greifswald, 17475 Greifswald, Germany.
16. Chair of Epidemiology, Ludwig-Maximilians-Universität München, UNIKA-T Augsburg, 86156 Augsburg, Germany.
17. Department of Cardiovascular Sciences, University of Leicester, Cardiovascular Research Centre, Glenfield Hospital, Leicester, LE3 9QP, UK.
18. NIHR Leicester Biomedical Research Centre, Glenfield Hospital, Groby Road, Leicester, LE3 9QP, UK.
19. Human Genetics Center, Department of Epidemiology, Human Genetics & Environmental Sciences, School of Public Health, The University of Texas Health Science Center at Houston, Houston, TX 77030 USA.
20. Department of Psychiatry, University of Edinburgh, Edinburgh, UK, EH10 5HF.
21. Survey Research Center, Institute for Social Research, University of Michigan, Ann Arbor, MI, USA.
22. Interfaculty Institute for Genetics and Functional Genomics, University Medicine Greifswald, 17475 Greifswald, Germany.
23. Department of Biostatistics and Center for Statistical Genetics, University of Michigan, Ann Arbor, Michigan, USA.
24. Centre for Global Health Research, Usher Institute for Population Health Sciences and Informatics, University of Edinburgh, Edinburgh, EH8 9AG, UK.
25. Centre for Cardiovascular Sciences, Queens Medical Research Institute, University of Edinburgh, Edinburgh, EH16 4TJ, Scotland.
26. Psychiatric Genetics, QIMR Berghofer Medical Research Institute, Brisbane, QLD 4006, Australia.
27. Department of Clinical Chemistry, Fimlab Laboratories, Tampere 33520, Finland.
28. Department of Clinical Chemistry, Finnish Cardiovascular Research Center - Tampere, Faculty of Medicine and Life Sciences, University of Tampere, Tampere 33014, Finland.
29. Department of Cardiology, Heart Center, Tampere University Hospital, Tampere 33521, Finland.

30. Department of Twin Research and Genetic Epidemiology, Kings College London, London SE1 7EH, UK.
31. NIHR Biomedical Research Centre at Guys and St Thomas Foundation Trust, London SE1 9RT, UK.
32. Department of Psychiatry, Amsterdam Neuroscience and Amsterdam Public Health research institute, Amsterdam University Medical Center, 1081 HJ Amsterdam, the Netherlands.
33. Department of Epidemiology, University Medical Center Groningen, University of Groningen, The Netherlands.
34. Folkhälsan Research Center, 00290 Helsinki, Finland.
35. Department of Public Health Solutions, National Institute for Health and Welfare, 00271 Helsinki, Finland.
36. Faculty of Medicine, University of Split, Split, 21000, Croatia.
37. Generation Scotland, Medical Genetics Section, Centre for Genomic and Experimental Medicine, Institute of Genetics and Molecular Medicine, University of Edinburgh, Edinburgh, UK, EH4 2XU.
38. Centre for Cognitive Ageing and Cognitive Epidemiology, Edinburgh, UK, EH8 9JZ.
39. Department of Epidemiology, University of Michigan, Ann Arbor, MI, USA.
40. Institute of Clinical Medicine, Internal Medicine, University of Eastern Finland, 70210 Kuopio, Finland.
41. DZHK (German Centre for Cardiovascular Research), partner site Greifswald, 17475 Greifswald, Germany.
42. Department of Psychology and Logopedics, Faculty of Medicine, 00014 University of Helsinki, Helsinki, Finland.
43. Population Health Research Institute, McMaster University, L8L 2X2 Hamilton, Canada.
44. Department of Molecular Biology, Medical Biochemistry and Pathology, Laval University, G1V 0A6 Quebec City, Canada.
45. Genetic Epidemiology, QIMR Berghofer Medical Research Institute, Brisbane, QLD 4006, Australia.
46. Department of Pediatrics/Nutrition, Baylor College of Medicine, 1 Baylor Plaza, Houston, Texas 77030 USA.
47. The Institute for Translational Genomics and Population Sciences, Department of Pediatrics, Los Angeles Biomedical Research Institute at Harbor-UCLA Medical Center, Torrance, California 90502, USA.
48. McKusick-Nathans Institute of Genetic Medicine, Johns Hopkins University School of Medicine, Baltimore, Maryland, USA.
49. Center for Life Course Health Research, Faculty of Medicine, University of Oulu, 90220, Oulu, Finland.
50. Oulunkaari Health Center, 91100 Ii, Finland.
51. Department of Biostatistics, Boston University School of Public Health.
52. Northern Finland Birth Cohorts, Faculty of Medicine, University of Oulu, 90220, Oulu, Finland.
53. Institute of Clinical Chemistry, Inselspital Bern, University Hospital, University of Bern, 3010 Bern, Switzerland.

54. Labormedizinisches Zentrum Dr. Risch, Vaduz, Liechtenstein.
55. Private University of the Principality of Liechtenstein, Triesen, Liechtenstein.
56. The Institute for Translational Genomics and Population Sciences, Departments of Pediatrics and Medicine, Los Angeles Biomedical Research Institute at Harbor-UCLA Medical Center, Torrance, California 90502, USA.
57. Department of Psychiatry, Research Unit of Clinical Neuroscience, 90014 University of Oulu, Finland.
58. Department of Psychiatry, University Hospital of Oulu, 90220 Oulu, Finland.
59. Medical research Center Oulu, University and University Hospital of Oulu, 90220 Oulu, Finland.
60. Department of General Practice and Primary health Care, Tukholmankatu 8 B, 00014 University of Helsinki, Finland.
61. National Institute for Health and Welfare, 00271 Helsinki, Finland.
62. Helsinki University Central Hospital, Unit of General Practice, 00290 Helsinki, Finland.
63. Department of Psychiatry and Psychotherapy, University Medicine Greifswald, 17475 Greifswald, Germany.
64. German Center for Neurodegenerative Diseases (DZNE), Rostock/Greifswald, 17475 Greifswald, Germany.
65. University Medical Center Groningen, University of Groningen, Department of Cardiology, the Netherlands.
66. University of Groningen, University Medical Center Groningen, Department of Genetics, Groningen, The Netherlands.
67. Durrer Center for Cardiogenetic Research, ICIN-Netherlands Heart Institute, Utrecht, The Netherlands.
68. Department of Psychiatry, University Medical Center Groningen, University of Groningen, 9713 GZ Groningen, The Netherlands.
69. MRC Human Genetics Unit, Institute of Genetics and Molecular Medicine, University of Edinburgh, Western General Hospital, Crewe Road, Edinburgh, EH4 2XU, UK.
70. Department of Psychiatry, School of Medicine, Washington University in St. Louis, St. Louis, MO 63110, USA.
71. Department of Epidemiology and Biostatistics, MRC-PHE Centre for Environment and Health, School of Public Health, Imperial College London, London, W2 1PG, United Kingdom.
72. Center for Life Course Health Research, Faculty of Medicine, University of Oulu, PO Box 8000, FI-90014 Oulun yliopisto, Finland.
73. Biocenter Oulu, University of Oulu, Aapistie 5, 90220 Oulu, Finland.
74. Unit of Primary Health Care, Oulu University Hospital, OYS, Kajaanintie 50, 90220 Oulu, Finland.
75. Department of Life Sciences, College of Health and Life Sciences, Brunel University London, Kingston Lane, Uxbridge, Middlesex UB8 3PH, United Kingdom.
76. Department of Clinical Physiology, Tampere University Hospital, Tampere 33521, Finland.

77. Department of Clinical Physiology, Finnish Cardiovascular Research Center - Tampere, Faculty of Medicine and Life Sciences, University of Tampere, Tampere 33014, Finland.
78. Institute of Clinical Medicine, Internal Medicine, University of Eastern Finland, and Kuopio University Hospital, 70210 Kuopio, Finland.
79. Department of Genetics, University of North Carolina, Chapel Hill, NC, USA.
80. Cardiovascular Health Research Unit, Departments of Medicine, Epidemiology, and Health Services, University of Washington, Seattle, WA, 98101.
81. Kaiser Permanente Washington Health Research Institute, Seattle, WA, 98101.
82. Department of Clinical Physiology and Nuclear Medicine, Turku University Hospital, Turku 20521, Finland.
83. Research Centre of Applied and Preventive Cardiovascular Medicine, University of Turku, Turku 20014, Finland.
84. Framingham Heart Study, Framingham, MA, USA.
85. Population Sciences Branch, National Heart, Lung, and Blood Institute, National Institutes of Health, Bethesda, MD.
86. Research Centre for Optimal Health, Department of Life Sciences, University of Westminster, London, W1W 6UW.
87. Departments of Psychiatry, Neurobiology & Anatomy, Human Genetics; School of Medicine; University of Utah, Salt Lake City, UT.
88. National Institute for Health Research Imperial Biomedical Research Centre, Imperial College Healthcare NHS Trust and Imperial College London, London, UK.
89. Health Data Research-UK London substantive site, London, UK.

Corresponding authors: Gunter Schumann ([gunter.schumann@kcl.ac.uk](mailto:gunter.schumann@kcl.ac.uk)) and Paul Elliott ([p.elliott@imperial.ac.uk](mailto:p.elliott@imperial.ac.uk))

## ABSTRACT

Excessive alcohol consumption is one of the main causes of death and disability worldwide. Alcohol consumption is a heritable complex trait. We conducted a genome-wide association study (GWAS) of alcohol use in ~480,000 people of European descent to decipher the genetic architecture of alcohol intake. We identified 46 novel, common loci, and investigated their potential functional significance using magnetic resonance imaging data, gene expression and behavioral studies in *Drosophila*. Our results identify new genetic pathways associated with alcohol consumption and suggest common genetic mechanisms with several neuropsychiatric disorders including schizophrenia.

1 Excessive alcohol consumption is a major public health problem that is responsible  
2 for 2.2% and 6.8% age-standardized deaths for women and men respectively<sup>1</sup>. Most  
3 genetic studies of alcohol use focus on alcohol dependency, although the burden of  
4 alcohol-related disease mainly reflects a broader range of alcohol consumption  
5 behaviors in a population<sup>2</sup>. Small reductions in alcohol intake could have major public  
6 health benefits; a recent study reported that even moderate daily alcohol may have  
7 significant impact on mortality<sup>3</sup>.

8 Alcohol consumption is a heritable complex trait<sup>4</sup>, but genetic studies to date have  
9 identified only a small number of robustly associated genetic variants<sup>5-8</sup>. These  
10 include variants in the aldehyde dehydrogenase gene family, a group of enzymes that  
11 catalyze the oxidation of aldehydes<sup>9</sup>, including a cluster of genes on chromosome  
12 4q23 (*ADH1B*, *ADH1C*, *ADH5*, *ADH6*, *ADH7*)<sup>6</sup>.

13 Here, we report a GWAS meta-analysis of alcohol intake (g/day) among people of  
14 European ancestry drawn from UK Biobank (UKB)<sup>10</sup>, the Alcohol Genome-Wide  
15 Consortium (AlcGen) and the Cohorts for Heart and Aging Research in Genomic  
16 Epidemiology Plus (CHARGE+) consortia. Briefly, UKB is a prospective cohort  
17 study of ~500,000 individuals recruited between the ages of 40-69 years. Participants  
18 were asked to report their average weekly and monthly alcohol consumption through  
19 a self-completed touchscreen questionnaire<sup>10</sup>. Based on these reports, we calculated  
20 the gram/day (g/d) alcohol intake (**Online Methods**). Participants were genotyped  
21 using a customized array with imputation from the Haplotype Reference Consortium  
22 (HRC) panel<sup>11</sup>, yielding ~7 million common single nucleotide polymorphisms (SNPs)  
23 with minor allele frequency (MAF)  $\geq 1\%$  and imputation quality score [INFO]  $\geq 0.1$ .  
24 After quality control (QC) and exclusions (**Online Methods**) we performed GWAS of  
25 alcohol consumption using data from 404,731 UKB participants of European descent  
26 under an additive genetic model (**Online Methods and Supplementary Table 1**). We  
27 found that genomic inflation in the UKB analysis was  $\lambda_{GC}=1.45$ , but did not adjust for  
28 inflation as the LD score regression intercept was 1.05, indicating that this was due to  
29 polygenicity rather than to population stratification<sup>12</sup>. The estimated SNP-wide  
30 heritability of alcohol consumption in the UKB data was 0.09.

31 We also carried out GWAS in 25 independent studies from the AlcGen and  
32 CHARGE+ consortia including 76,111 participants of European descent for which  
33 alcohol g/d could be calculated (**Supplementary Table 2**). Various arrays were used  
34 for genotyping, with imputations performed using either the 1,000 Genomes  
35 Reference Panel or the HRC platforms (**Supplementary Table 3**). After QC, we  
36 applied genomic control at the individual study level and obtained summary results  
37 for ~7 million SNPs with imputation quality score  $\geq 0.3$  (**Online Methods**).



38 We combined the UKB, AlcGen and CHARGE+ results using a fixed effects inverse  
39 variance weighted approach for a total of 480,842 individuals<sup>13</sup>. To maximize power,  
40 we performed a single-stage analysis to test common SNPs with MAF  $\geq 1\%$ . We set a  
41 stringent  $P$ -value threshold of  $P < 5 \times 10^{-9}$  to denote significance in the combined  
42 meta-analysis<sup>14</sup>, and required signals to be significant at  $P < 5 \times 10^{-7}$  in UKB, with  
43 same direction of effect in UKB and AlcGen plus CHARGE+, to minimize false  
44 positive findings. We excluded SNPs within 500kb of variants reported as genome-  
45 wide significant in previous GWAS of alcohol consumption<sup>5,6</sup>, identified novel loci  
46 by requiring SNPs to be independent of each other (LD  $r^2 < 0.1$ ), and selected the  
47 sentinel SNP within each locus according to lowest  $P$ -value (**Online Methods**).

48 We then tested for correlations of alcohol-associated SNPs with Magnetic Resonance  
49 Imaging (MRI) phenotypes of brain, heart and liver, and gene expression.  
50 Associations of the sentinel SNPs with other traits/diseases were investigated and  
51 *Drosophila* mutant models used to test for functional effects on ethanol-induced  
52 behavior.

## 53 **RESULTS**

54 Our meta-analysis identified 46 novel loci associated with alcohol consumption (log  
55 transformed g/day) (**Fig. 1 and Table 1**). We discovered eight additional variants in  
56 the combined analysis at nominal genome-wide significance ( $P < 1 \times 10^{-8}$ ) that may  
57 also be associated with alcohol intake (**Supplementary Table 4**). The most  
58 significantly associated variant, rs1991556 ( $P < 4.5 \times 10^{-23}$ ), is an intronic variant in  
59 *MAPT* gene that encodes the microtubule-associated protein tau, and was found  
60 through Phenoscanner not only to be associated with dementia<sup>15</sup> and Parkinson's  
61 disease<sup>16,17</sup>, but also with neuroticism, schizophrenia<sup>18</sup> and other conditions<sup>19-21</sup>  
62 (**Online Methods, Fig. 2 and Supplementary Table 5**). The second most  
63 significantly associated variant is rs1004787 ( $P < 6.7 \times 10^{-17}$ ), near *SIX3* gene, which  
64 encodes a member of the sine oculis homeobox transcription factor family involved in  
65 eye development<sup>22</sup>. The third SNP is rs13107325 ( $P < 1.3 \times 10^{-15}$ ), a missense SNP in  
66 *SLC39A8*, a gene that encodes a member of the SLC39 family of metal ion  
67 transporters, which has been associated with schizophrenia<sup>23</sup> as well as inflammatory  
68 bowel disease, cardiovascular and metabolic phenotypes<sup>24-25-27</sup> in previous GWAS  
69 (**Fig. 2 and Supplementary Table 5**).

70  
71 Another of our most significant variants, an intronic SNP rs7121986 ( $P < 6.2 \times 10^{-14}$ )  
72 in *DRD2*, encodes the dopamine receptor D2 that has been associated with cocaine  
73 addiction, neuroticism and schizophrenia<sup>18</sup>. We also found significant associations  
74 with SNP rs988748 ( $P < 4.4 \times 10^{-9}$ ) in the gene encoding BDNF (brain-derived  
75 neurotrophic factor) and rs7517344, which is near *ELAVL4* ( $P = 2.0 \times 10^{-10}$ ), the gene

76 product of which is involved in BDNF regulation<sup>28</sup>. Previous studies have suggested  
77 that variation in *BDNF* is a genetic determinant of alcohol consumption and that  
78 alcohol consumption modulates BDNF expression<sup>29</sup>.

79

80 Additionally, we found association of alcohol consumption with SNP rs838145 ( $P <$   
81  $3.2 \times 10^{-15}$ ), which has been associated with macronutrient intake in a previous  
82 GWAS<sup>30</sup>. This variant is localized to *IZUMO1*, a locus of around 50kb that spans a  
83 number of genes including *FGF21*, whose gene product FGF21 is a liver hormone  
84 involved in the regulation of alcohol preference, glucose and lipid metabolism<sup>31</sup>. We  
85 previously reported significant association of alcohol intake with SNP rs11940694 in  
86 *KLB*, an obligate receptor of FGF21 in the brain<sup>5</sup>, and strongly replicated that finding  
87 here ( $P = 3.3 \times 10^{-68}$ ).

88

89 As well as variants in *KLB*, we found support ( $P < 1 \times 10^{-5}$ ) for association of  
90 common variants in all four of the other previously reported alcohol intake-related  
91 loci (**Supplementary Table 6**). These replicated loci include SNP rs6943555 in  
92 *AUTS2* ( $P = 2.9 \times 10^{-6}$ ) and variants in the alcohol dehydrogenase locus (lowest  $P =$   
93  $1.2 \times 10^{-125}$ ). In addition, we found a novel alcohol intake-related SNP rs1421085 in  
94 *FTO* in high LD ( $r^2 = 0.92$ ) with a variant reported previously as genome-wide  
95 significant for association with alcohol dependence<sup>32</sup>.

96

97 Conditional analysis using Genome-wide Complex Trait Analysis (GCTA) did not  
98 reveal any independent secondary signals related to alcohol consumption. Among  
99 ~14,000 individuals in the independent Airwave cohort<sup>33</sup> (**Online Methods**), 7% of  
100 the variance in alcohol consumption was explained by the novel and known common  
101 variants. Using weights from our analysis, we constructed an unbiased weighted  
102 genetic risk score (GRS) in Airwave (**Online Methods**) and found a strong  
103 association of the novel and known variants on alcohol consumption levels ( $P = 2.75$   
104  $\times 10^{-14}$ ), with mean difference in sex-adjusted alcohol intake of 2.6 g/d comparing the  
105 top vs the bottom quintile of the GRS (**Supplementary Table 7**).

106

## 107 **Associations with MRI imaging phenotypes**

108 We performed single-SNP analyses of the imaging phenotypes in UKB (**Online**  
109 **Methods**) to investigate associations of our novel variants with MRI of brain  
110 (N=9,702), heart (N=10,706) and liver (N=8,479). With Bonferroni correction  
111 (corrected  $P$ -value  $6.6 \times 10^{-6}$ , corresponding to  $0.05/46$  SNPs\*164 imaging  
112 phenotypes), we found significant positive associations between rs13107325 and the  
113 volumes of multiple brain regions; the strongest associations were with putamen (left:



114  $P = 2.5 \times 10^{-45}$ , right:  $P = 2.8 \times 10^{-47}$ ), ventral striatum (left:  $P = 9.5 \times 10^{-53}$ , right:  $P =$   
115  $9.6 \times 10^{-51}$ ) and cerebellum (strongest association for left I-IV volume;  $P = 1.2 \times 10^{-9}$ )  
116 (**Supplementary Table 8**); similar findings were also recently reported in a GWAS  
117 on brain imaging in UKB<sup>34</sup>. The other significant association was for rs1991556 with  
118 the parahippocampal gyrus ( $P = 1.2 \times 10^{-6}$ ).

119 We then tested these brain regions for association with alcohol consumption and  
120 found a significant effect for the left ( $P = 2.0 \times 10^{-4}$ ) and right ( $P = 2.6 \times 10^{-4}$ )  
121 putamen. Finally, we used data from  $N = 8,610$  individuals and performed a mediation  
122 analysis using a standard three-variable path model, bootstrapping 10,000 times to  
123 calculate the significance of the mediation effect of putamen volume for genetic  
124 influences on alcohol consumption (**Online Methods**). We found evidence that the  
125 effect of SNP rs13107325 in *SLC39A8* on alcohol intake is partially mediated via its  
126 association with left (beta=-0.27;  $P = 1.9 \times 10^{-3}$ ) and right (beta=-0.26;  $P = 1.7 \times 10^{-3}$ )  
127 putamen volume (**Fig. 3 and Supplementary Table 9**).

128 We did not find any significant associations of novel SNPs with either cardiac (left  
129 ventricular mass or end diastolic volume or right ventricular end diastolic volume)  
130 (**Supplementary Table 10**) or liver fat measures on MRI (**Supplementary Table**  
131 **11**), after adjustment for multiple testing.

### 132 **Effects of SNPs on gene expression**

133 We carried out expression quantitative trait loci eQTL analyses using the Genotype-  
134 Tissue Expression (GTEx) and the UK Brain Expression Consortium (UKBEC)  
135 datasets; 34 of the 53 novel and known SNPs associated with alcohol consumption  
136 have a significant effect on gene expression in at least one tissue, including 33 SNPs  
137 that affected gene expression in the brain (**Supplementary Tables 12 and 13, and**  
138 **Supplementary Fig. 1-4**). We found that the most significant eQTLs often do not  
139 involve the nearest gene and that several of the SNPs affect expression of different  
140 genes in different tissues (**Supplementary Fig. 4**). For example, SNP rs1991556 in  
141 the *MAPT* gene affects expression of 33 genes overall, with most significant effects  
142 on the expression of the non-protein coding genes *CRHR1-IT1* (also known as  
143 *C17orf69* or *LINC02210*) and *LRRC37A4P*, near *MAPT*, across a wide range of  
144 tissues including brain, adipose tissue and skin ( $P = 7.2 \times 10^{-126}$  to  $P = 2.5 \times 10^{-6}$ )  
145 (**Supplementary Fig. 4**). Similarly, the A-allele at SNP rs2071305 within *MYBPC3*  
146 affects the expression of several genes and is most significantly associated with  
147 increased expression of *CIQTNF4* across several tissues ( $P = 1.9 \times 10^{-25}$  to  $P = 8.4 \times$   
148  $10^{-5}$ ).

149 Several of these eQTLs were found to affect expression of genes known to be  
150 involved in reward and addiction. SNP rs1053651 in the *TCAP-PNMT-STARD3* gene  
151 cluster affects expression of the *PPP1R1B* gene (also known as *DARPP-32*) which  
152 encodes a protein that mediates the effects of dopamine in the mesolimbic reward  
153 pathway<sup>35</sup>. Other known addiction-related genes include *ANKK1* and *DRD2* (affected  
154 by SNP rs7121986) implicated in alcohol and nicotine dependence<sup>36,37</sup>, *CRHR1*  
155 (affected by SNP rs1991556) involved in stress-mediated alcohol dependence<sup>38,39</sup> and  
156 *PPM1G* (SNP rs1260326) whose epigenetic modification was reported to be  
157 associated with alcohol abuse<sup>40</sup>.

158 Over-representation enrichment analyses based on functional annotations and disease-  
159 related terms indicated that genes whose expressions are affected by the identified  
160 eQTLs are most significantly enriched for terms related to abdominal cancers (n =  
161 91), motor function (n= 5) and cellular homeostasis (n= 22) (**Supplementary Fig 5**).

## 162 **Other traits and diseases**

163

164 Using LD score regression<sup>12</sup>, we assessed genetic correlations between alcohol  
165 consumption and 235 complex traits and diseases from publicly available summary  
166 GWAS statistics (**Online Methods and Supplementary Table 14**). The strongest  
167 positive genetic correlations based on false discovery rate  $P < 0.02$  were found for  
168 smoking ( $r_g = 0.42$ ,  $P = 1.0 \times 10^{-23}$ ) and HDL cholesterol levels ( $r_g = 0.26$ ,  $P = 5.1 \times 10^{-7}$ )  
169 <sup>13</sup>). We also found negative correlations for sleep duration ( $r_g = -0.14$ ,  $P = 3.8 \times 10^{-7}$ )  
170 and fasting insulin levels ( $r_g = -0.25$ ,  $P = 4.5 \times 10^{-6}$ ). A significant genetic correlation  
171 was also found with schizophrenia ( $r_g = 0.07$ ,  $P = 3.9 \times 10^{-3}$ ) and bipolar disorder ( $r_g =$   
172  $0.15$ ,  $P = 5.0 \times 10^{-4}$ ) (**Supplementary Table 14**). Over-representation enrichment  
173 analysis using WebGestalt<sup>41</sup> showed that our list of novel and known variants are  
174 significantly enriched in several diseases and traits including developmental disorder  
175 in children ( $P < 7.3 \times 10^{-5}$ ), epilepsy ( $P < 1.4 \times 10^{-4}$ ), heroin dependence ( $P = 5.7 \times 10^{-4}$ )  
176 <sup>4</sup>) and schizophrenia ( $P < 8.4 \times 10^{-4}$ ) (**Supplementary Fig. 6**). The result of  
177 Mendelian randomization analysis (**Online methods**) to assess a potential causal  
178 effect of alcohol on schizophrenia risk, using the inverse variance weighted approach,  
179 was not significant ( $P = 0.089$ ), with large heterogeneity of the estimates of the tested  
180 variants.

## 181 **Functional studies in *Drosophila***

182 Based on our GWAS and brain imaging findings we took forward SNP rs13107325 in  
183 *SLC39A8* (alias *Zip8* gene) for additional testing in *Drosophila*, which employ  
184 conserved mechanisms to modulate ethanol-induced behaviors<sup>42,43</sup>. First, we  
185 overexpressed human *Zip8* using a Gal4-driver that included expression in neurons

186 involved in multiple ethanol-induced behaviors<sup>43</sup>. Flies carrying *ics<sup>Gal4</sup>/+ UAS-*  
187 *hZip8/+* showed a slight, but significant, resistance to ethanol-induced sedation  
188 compared to control flies ( $P = 0.026$ ;  $N = 16$  per genotype). Ethanol tolerance,  
189 induced with repeat exposures spaced by a 4-hour recovery, was unchanged in these  
190 flies (**Fig. 4a**). We next used the same Gal4-driver to knock down the endogenous  
191 *Drosophila* ortholog of *hZip8*, namely *dZip71B*. This caused the flies to display naïve  
192 sensitivity to ethanol-induced sedation, and in addition, these flies developed greater  
193 tolerance to ethanol upon repeat exposure ( $P = 0.0003$ ;  $N = 8$  per genotype) (**Fig. 4b**).  
194 To corroborate this phenotype, we then tested flies transheterozygous for two  
195 independent transposon-insertions in the middle of the *dZip71B* gene  
196 (**Supplementary Fig. 7**) and found that these *dZip71B<sup>Mi/MB</sup>* flies also displayed naïve  
197 sensitivity ( $P = 0.006$ ) and increased ethanol-induced tolerance ( $P = 0.032$ ),  
198 compared to controls ( $N = 8$  each) (**Fig. 4c**).

199  
200

## DISCUSSION

201 Our discovery utilizing data on common variants from over 480,000 people of  
202 European descent has greatly extended our knowledge of the genetic architecture of  
203 alcohol intake, increasing the number of loci by nearly 10-fold to 46. We found loci  
204 involved in neuropsychiatric conditions such as schizophrenia, Parkinson's disease  
205 and dementia, as well as *BDNF* where gene expression is affected by alcohol abuse.  
206 Our findings illustrate that large-scale studies of genetic associations with alcohol  
207 intake in the general population, rather than in alcohol dependency alone, can provide  
208 new insights into genetic mechanisms regulating alcohol consumption.

209 We highlight the role of the highly pleiotropic *MAPT* and *SLC39A8* genes in the  
210 genetics of alcohol consumption. *MAPT* plays a key role in tau-associated dementia<sup>44</sup>  
211 and both genes are also implicated in other neuropsychiatric conditions including  
212 neuroticism, schizophrenia and Parkinson's disease<sup>16-18</sup>. The *SLC39A8* gene encodes a  
213 member of the SLC39 family of metal ion transporters. The encoded protein is  
214 glycosylated and found in plasma membrane and mitochondria, and is involved in the  
215 cellular transport of zinc, modulation of which could affect microglial inflammatory  
216 responses<sup>45</sup>. Our gain- and loss-of-function studies in *Drosophila* indicate a potential  
217 causal role of *SLC39A8* in alcohol drinking behavior. The MRI brain imaging  
218 demonstrates a significant association of SNP rs13107325 in the *SLC39A8* gene and  
219 putamen volume differences, and these structural differences appear to partially  
220 mediate associations of rs13107325 with alcohol consumption. The putamen has  
221 been associated with alcohol consumption and the withdrawal syndrome after chronic  
222 administration to rodents and non-human primates<sup>46</sup>. Putamen volume differences  
223 have also been associated with both schizophrenia and psychosis<sup>47,48</sup> and robust

224 association between SNP rs13107325 in *SLC39A8* and schizophrenia was reported in  
225 a previous GWAS<sup>23</sup>.

226 We also report SNP rs7121986 near *DRD2* as a novel alcohol intake variant in  
227 GWAS. The gene product of *DRD2*, D2 dopamine receptor, is a G protein-coupled  
228 receptor on post-synaptic dopaminergic neurons that has long been implicated in  
229 alcoholism<sup>49</sup>. In addition, we identify SNP rs988748 in *BDNF* as a novel alcohol  
230 intake variant; *BDNF* expression is differentially affected by alcohol exposure in  
231 animal models<sup>50,51</sup>. Both genes (along with *PPP1R1P*) are centrally involved in  
232 reward-mediating mesocortico-limbic pathways and both are implicated in the  
233 development of schizophrenia. For example, there is a robust GWAS association  
234 between schizophrenia and SNP rs4938021 in *DRD2* (in perfect LD with our novel  
235 alcohol intake-related variant rs7121986) and *DRD2* appears to be pivotal in network  
236 analyses of genes involved in schizophrenia<sup>52</sup>. Taken together, our results suggest  
237 that there are shared genetic mechanisms between the regulation of alcohol intake and  
238 susceptibility to schizophrenia, as well as other neuropsychiatric disorders. In this  
239 regard, large prospective epidemiological studies report a three-fold risk of  
240 schizophrenia in relation to alcohol abuse<sup>53</sup>.

241 We previously reported genome-wide significant associations of alcohol intake with  
242 *KLB*, and identified a liver-brain axis linking the liver hormone FGF21 with central  
243 regulation of alcohol intake involving  $\beta$ -Klotho receptor (the gene product of *KLB*) in  
244 the brain<sup>5</sup>. Here, we identify a significant variant near *FGF21* gene and strongly  
245 replicate the previously reported *KLB* gene variant, strengthening the genetic evidence  
246 for the importance of this pathway in regulating alcohol consumption.

247 The LD score regression analysis showed a positive genetic correlation between  
248 alcohol consumption, smoking and HDL cholesterol levels. This confirms previous  
249 findings that reported an almost identical genetic correlation of alcohol consumption  
250 with number of cigarettes per day<sup>54</sup>. Furthermore, the observed genetic correlation  
251 with HDL levels is consistent with previous observations of an association between  
252 alcohol consumption and HDL<sup>55,56</sup>, including results of a Mendelian randomization  
253 study that suggested a possible causal role linking alcohol intake with increased HDL  
254 levels<sup>57</sup>. Finally, we found a genetic correlation (inverse) between sleep duration and  
255 alcohol consumption, an association previously reported only in a few small  
256 epidemiological studies<sup>58</sup>. We could not test for a genetic association between alcohol  
257 and risk of alcohol-related cancers<sup>59</sup> because of limited availability of summary data.  
258 However, our gene-set enrichment analysis showed a significant enrichment for genes  
259 related to abdominal cancers.

260 Strengths of our study include its size, detailed attention to the alcohol phenotype,  
261 dense coverage of the genome through imputation, incorporation of brain and other  
262 imaging data to explore potential mechanisms and confirmatory *Drosophila*  
263 functional genetic studies. Over 80% of the data came from UKB, which combines  
264 high-quality phenotypic data and imputed genome-wide genetic data with strict  
265 attention to quality control<sup>60</sup>. We adopted a stringent approach to claim novel variants  
266 involving a conservative *P*-value threshold, internal replication in UKB and consistent  
267 direction of effect with the other studies, to minimize the reporting of false positive  
268 signals.

269 However, since alcohol intake is socio-culturally as well as genetically determined, it  
270 is influenced by other lifestyle and environmental factors which may modify or dilute  
271 the genetic signal. A key limitation is that assessment of alcohol intake relies on self-  
272 report, which is prone to errors and biases including recall bias and systematic under-  
273 reporting by heavy drinkers<sup>61,62</sup>. Furthermore, questionnaires on alcohol intake  
274 covered a short duration (e.g. day or week) at a single period, which may not be  
275 representative of broader drinking patterns of cohort participants. We harmonized data  
276 across cohorts by converting alcohol intake into a common metric of g/d, with  
277 imputation as necessary in UKB for participants reporting consumption of small  
278 amounts of alcohol. Taking this approach, we were able to detect strong genetic  
279 associations with alcohol intake that explained 7% of the variance in alcohol in an  
280 independent cohort, while our GRS analysis indicates that individuals in the lower  
281 fifth of the GRS distribution were consuming daily approximately one third of a  
282 standard drink (2.6 g/d alcohol) less compared with those in the upper fifth.

283 In summary, in this large study of genetic associations with alcohol consumption, we  
284 identified common variants in 46 novel loci with several of the genes expressed in the  
285 brain as well as other tissues. Our findings suggest that there may be common genetic  
286 mechanisms underpinning regulation of alcohol intake and development of a number  
287 of neuropsychiatric disorders including schizophrenia. This may form the basis for  
288 greater understanding of observed associations between excessive alcohol  
289 consumption and schizophrenia<sup>63</sup>.

#### 290 **URLs**

291 GTEEx: [www.gtexportal.org](http://www.gtexportal.org)

292 UKBEC: <http://www.braineac.org/>

293 WebGetstalt: <http://www.webgestalt.org>

294 IPA: [www.qiagen.com/ingenuity](http://www.qiagen.com/ingenuity)

295 PhenoScanner: <http://www.phenoscanter.medschl.cam.ac.uk> (Phenoscanter

296 integrates results from the GWAS catalogue: <https://www.ebi.ac.uk/gwas/> and

297 GRASP: <https://grasp.nhlbi.nih.gov/>)

298

299

300 **Acknowledgements**

301 H.G. was funded by the NIHR Imperial College Health Care NHS Trust and Imperial  
302 College London Biomedical Research Centre. I.K. was supported by the EU  
303 PhenoMeNal project (Horizon 2020, 654241) and the UK Dementia Research  
304 Institute, which is supported by the MRC, the Alzheimer's Society and Alzheimer's  
305 Research UK. S.Thériault was supported by the Canadian Institutes of Health  
306 Research and Université Laval (Quebec City, Canada). L.R. was supported by  
307 Forschungs- und Förder-Stiftung INOVA, Vaduz, Liechtenstein. D.C. holds a  
308 McMaster University Department of Medicine Mid-Career Research Award. M.B. is  
309 supported by NIH grant R01-DK062370. P.v.d.H. was supported by ICIN-NHI and  
310 Marie Skłodowska-Curie GF (call: H2020-MSCA-IF-2014, Project ID: 661395). C.H.  
311 was supported by a core MRC grant to the MRCHGU QTL in Health and Disease  
312 research programme. N.V. was supported by Marie Skłodowska-Curie GF grant  
313 (661395) and ICIN-NHI. P.E. acknowledges support from the NIHR Biomedical  
314 Research Centre at Imperial College Healthcare NHS Trust and Imperial College  
315 London, the NIHR Health Protection Research Unit in Health Impact of  
316 Environmental Hazards (HPRU-2012-10141), and the Medical Research Council  
317 (MRC) and Public Health England (PHE) Centre for Environment and Health  
318 (MR/L01341X/1). P.E. is a UK Dementia Research Institute (DRI) professor, UK  
319 DRI at Imperial College London, funded by the MRC, Alzheimer's Society and  
320 Alzheimer's Research UK. This work received support from the following sources:  
321 the European Union-funded FP6 Integrated Project IMAGEN (Reinforcement-related  
322 behaviour in normal brain function and psychopathology) (LSHM-CT- 2007-037286),  
323 the Horizon 2020 funded ERC Advanced Grant 'STRATIFY' (Brain network based  
324 stratification of reinforcement-related disorders) (695313), ERANID (Understanding  
325 the Interplay between Cultural, Biological and Subjective Factors in Drug Use  
326 Pathways) (PR-ST-0416-10004), BRIDGET (JPND: BRain Imaging, cognition  
327 Dementia and next generation GENomics) (MR/N027558/1), the FP7 projects  
328 IMAGEMEND(602450; IMAGING GENetics for MENTAL Disorders) and MATRICS  
329 (603016), the Innovative Medicine Initiative Project EU-AIMS (115300-2), the  
330 Medical Research Council Grant 'c-VEDA' (Consortium on Vulnerability to  
331 Externalizing Disorders and Addictions) (MR/N000390/1), the Swedish Research  
332 Council FORMAS, the Medical Research Council, the National Institute for Health  
333 Research (NIHR) Biomedical Research Centre at South London and Maudsley NHS  
334 Foundation Trust and King's College London, the Bundesministerium für Bildung und  
335 Forschung (BMBF grants 01GS08152; 01EV0711; eMED SysAlc01ZX1311A;  
336 Forschungsnetz AERIAL 01EE1406A, 01EE1406B), the Deutsche  
337 Forschungsgemeinschaft (DFG grants SM 80/7-2, SFB 940/2), the Medical Research  
338 Foundation and Medical research council (grant MR/R00465X/1), the Human Brain



339 Project (HBP SGA 2). Further support was provided by grants from: ANR (project  
340 AF12-NEUR0008-01 - WM2NA, and ANR-12-SAMA-0004), the Fondation de  
341 France, the Fondation pour la Recherche Médicale, the Mission Interministérielle de  
342 Lutte-contre-les-Drogues-et-les-Conduites-Addictives (MILDECA), the Assistance-  
343 Publique-Hôpitaux-de-Paris and INSERM (interface grant), Paris Sud University  
344 IDEX 2012; the National Institutes of Health, Science Foundation Ireland  
345 (16/ERCDC/3797), U.S.A. (Axon, Testosterone and Mental Health during  
346 Adolescence; RO1 MH085772-01A1), and by NIH Consortium grant U54 EB020403,  
347 supported by a cross-NIH alliance that funds Big Data to Knowledge Centres of  
348 Excellence.

349

350

### 351 **Conflicts/Disclosures**

352 B.M.P. serves on the DSMB of a clinical trial funded by the manufacturer (Zoll  
353 LifeCor) and on the Steering Committee of the Yale Open Data Access Project funded  
354 by Johnson & Johnson.

355 B.W.J.H.P. has received research funding (non-related to the work reported here)  
356 from Jansen Research and Boehringer Ingelheim.

357

358

### 359 **Author contributions**

360

361 **Central analysis:** E.E., H.G., C.C., G.N., P.B., A.R.B., R.P., H.Suzuki, F.K., A.M.Y.,  
362 I.K., J.E., N.D., D.L., I.T., J.D.B., P.M.M., A.R., S.D., G.S., P.E.

363

364 **Writing of the manuscript:** E.E., H.G., C.C., G.N., P.B., A.R.B., R.P., H.Suzuki, F.K.,  
365 A.M.Y., I.K., D.L., I.T., J.D.B., P.M.M., A.R., S.D., G.S., P.E.

366

367 **Association of MRI analysis:** C.C., H.Suzuki, A.M.Y., A.I.B., J.D.B., P.M.M., G.S.

368

369 **Alcgen and Charge+ contributor:** (ARIC): A.C.M., M.R.B., B.Y., D.E.A., (CHS):  
370 B.M.P., R.N.L., T.M.B., J.A.B., (FHS): D.L., C.L., (GAPP/Swiss-AF/Beat-AF):  
371 S.Thériault, S.A., D.C., L.R., M.Kühne, (GENOA): S.L.R.K., J.A.S., W.A., S.M.R.,  
372 (GRAPHIC): N.J.S., C.P.N., P.S.B., (GS): A.M.M., T-K.C., C.H., D.P., (HBCS): L.J.,  
373 S.Tuominen, M.M.P., J.G.E., (HRS): D.R.W., S.L.R.K., J.D.F., W.Z., J.A.S.,  
374 (MESA): X.G., J.Y., A.W., J.I.R., (METSIM): M.L., A.S., J.Vangipurapu, J.K.,  
375 (FUSION): M.B., K.L.M., L.J.S., A.U.J., (NESDA): B.W.J.H.P., Y.M., (NFBC): M-  
376 R.J., J.Vejjola, M.Männikkö, J.A., (ORCADES): H.C., P.K.J, (VIKING): J.F.W.,  
377 K.A.K., (Croatia-VIS): I.R., O.P., (Croatia-KORCULA): C.H., (PREVEND): N.V.,  
378 P.v.d.H, (OZALC): M.G.N., J.B.W., P.A.L., A.C.H., (SHIP): A.T., H.J.G., S.E.B.,  
379 G.H., (TRAILS-pop): A.J.O, I.M.N., (TRAILS-CC): C.A.H., H.Snieder , (TwinsUK):  
380 T.D.S, M.Mangino, (YFS): L-P.L., M.Kähönen, O.T.R., T.L.

381

382 *All authors critically reviewed and approved the final version of the manuscript*

383

384 **References**

385

386

- 387 1. GBD 2016 Alcohol Collaborators. Alcohol use and burden for 195 countries  
388 and territories, 1990-2016: a systematic analysis for the Global Burden of  
389 Disease Study 2016. *Lancet* (2018).
- 390 2. World Health Organization. Global status report on alcohol and health 2018.  
391 (2018).
- 392 3. Wood, A.M. *et al.* Risk thresholds for alcohol consumption: combined  
393 analysis of individual-participant data for 599 912 current drinkers in 83  
394 prospective studies. *Lancet* **391**, 1513-1523 (2018).
- 395 4. Verhulst, B., Neale, M.C. & Kendler, K.S. The heritability of alcohol use  
396 disorders: a meta-analysis of twin and adoption studies. *Psychol Med* **45**,  
397 1061-72 (2015).
- 398 5. Schumann, G. *et al.* KLB is associated with alcohol drinking, and its gene  
399 product beta-Klotho is necessary for FGF21 regulation of alcohol preference.  
400 *Proc Natl Acad Sci U S A* **113**, 14372-14377 (2016).
- 401 6. Clarke, T.K. *et al.* Genome-wide association study of alcohol consumption  
402 and genetic overlap with other health-related traits in UK Biobank (N=112  
403 117). *Mol Psychiatry* **22**, 1376-1384 (2017).
- 404 7. Jorgenson, E. *et al.* Genetic contributors to variation in alcohol consumption  
405 vary by race/ethnicity in a large multi-ethnic genome-wide association study.  
406 *Mol Psychiatry* **22**, 1359-1367 (2017).
- 407 8. Baik, I., Cho, N.H., Kim, S.H., Han, B.G. & Shin, C. Genome-wide  
408 association studies identify genetic loci related to alcohol consumption in  
409 Korean men. *Am J Clin Nutr* **93**, 809-16 (2011).
- 410 9. Jackson, B. *et al.* Update on the aldehyde dehydrogenase gene (ALDH)  
411 superfamily. *Hum Genomics* **5**, 283-303 (2011).
- 412 10. Sudlow, C. *et al.* UK biobank: an open access resource for identifying the  
413 causes of a wide range of complex diseases of middle and old age. *PLoS Med*  
414 **12**, e1001779 (2015).
- 415 11. McCarthy, S. *et al.* A reference panel of 64,976 haplotypes for genotype  
416 imputation. *Nat Genet* **48**, 1279-83 (2016).
- 417 12. Bulik-Sullivan, B.K. *et al.* LD Score regression distinguishes confounding  
418 from polygenicity in genome-wide association studies. *Nat Genet* **47**, 291-5  
419 (2015).
- 420 13. Evangelou, E. & Ioannidis, J.P. Meta-analysis methods for genome-wide  
421 association studies and beyond. *Nat Rev Genet* **14**, 379-89 (2013).
- 422 14. Evangelou, E. *et al.* Genetic analysis of over 1 million people identifies 535  
423 new loci associated with blood pressure traits. *Nat Genet* **50**, 1412-1425  
424 (2018).
- 425 15. Desikan, R.S. *et al.* Genetic overlap between Alzheimer's disease and  
426 Parkinson's disease at the MAPT locus. *Mol Psychiatry* **20**, 1588-95 (2015).

- 427 16. Do, C.B. *et al.* Web-based genome-wide association study identifies two novel  
428 loci and a substantial genetic component for Parkinson's disease. *PLoS Genet*  
429 **7**, e1002141 (2011).
- 430 17. Pankratz, N. *et al.* Meta-analysis of Parkinson's disease: identification of a  
431 novel locus, RIT2. *Ann Neurol* **71**, 370-84 (2012).
- 432 18. Okbay, A. *et al.* Genetic variants associated with subjective well-being,  
433 depressive symptoms, and neuroticism identified through genome-wide  
434 analyses. *Nat Genet* **48**, 624-33 (2016).
- 435 19. Couch, F.J. *et al.* Genome-wide association study in BRCA1 mutation carriers  
436 identifies novel loci associated with breast and ovarian cancer risk. *PLoS*  
437 *Genet* **9**, e1003212 (2013).
- 438 20. Ikram, M.A. *et al.* Common variants at 6q22 and 17q21 are associated with  
439 intracranial volume. *Nat Genet* **44**, 539-44 (2012).
- 440 21. van der Harst, P. *et al.* Seventy-five genetic loci influencing the human red  
441 blood cell. *Nature* **492**, 369-75 (2012).
- 442 22. Samuel, A. *et al.* Six3 regulates optic nerve development via multiple  
443 mechanisms. *Sci Rep* **6**, 20267 (2016).
- 444 23. Schizophrenia Working Group of the Psychiatric Genomics, C. Biological  
445 insights from 108 schizophrenia-associated genetic loci. *Nature* **511**, 421-7  
446 (2014).
- 447 24. Liu, J.Z. *et al.* Association analyses identify 38 susceptibility loci for  
448 inflammatory bowel disease and highlight shared genetic risk across  
449 populations. *Nat Genet* **47**, 979-986 (2015).
- 450 25. International Consortium for Blood Pressure Genome-Wide Association  
451 Studies *et al.* Genetic variants in novel pathways influence blood pressure and  
452 cardiovascular disease risk. *Nature* **478**, 103-9 (2011).
- 453 26. Speliotes, E.K. *et al.* Association analyses of 249,796 individuals reveal 18  
454 new loci associated with body mass index. *Nat Genet* **42**, 937-48 (2010).
- 455 27. Teslovich, T.M. *et al.* Biological, clinical and population relevance of 95 loci  
456 for blood lipids. *Nature* **466**, 707-13 (2010).
- 457 28. Lim, C.S. & Alkon, D.L. Protein kinase C stimulates HuD-mediated mRNA  
458 stability and protein expression of neurotrophic factors and enhances dendritic  
459 maturation of hippocampal neurons in culture. *Hippocampus* **22**, 2303-19  
460 (2012).
- 461 29. Barker, J.M., Taylor, J.R., De Vries, T.J. & Peters, J. Brain-derived  
462 neurotrophic factor and addiction: Pathological versus therapeutic effects on  
463 drug seeking. *Brain Res* **1628**, 68-81 (2015).
- 464 30. Tanaka, T. *et al.* Genome-wide meta-analysis of observational studies shows  
465 common genetic variants associated with macronutrient intake. *Am J Clin Nutr*  
466 **97**, 1395-402 (2013).
- 467 31. Talukdar, S. *et al.* FGF21 Regulates Sweet and Alcohol Preference. *Cell*  
468 *Metab* **23**, 344-9 (2016).
- 469 32. Grant, S.F. *et al.* Association analysis of the FTO gene with obesity in  
470 children of Caucasian and African ancestry reveals a common tagging SNP.  
471 *PLoS One* **3**, e1746 (2008).

- 472 33. Elliott, P. *et al.* The Airwave Health Monitoring Study of police officers and  
473 staff in Great Britain: rationale, design and methods. *Environ Res* **134**, 280-5  
474 (2014).
- 475 34. Elliott, L.T. *et al.* Genome-wide association studies of brain imaging  
476 phenotypes in UK Biobank. *Nature* **562**, 210-216 (2018).
- 477 35. Stipanovich, A. *et al.* A phosphatase cascade by which rewarding stimuli  
478 control nucleosomal response. *Nature* **453**, 879-84 (2008).
- 479 36. Yang, B.Z. *et al.* Association of haplotypic variants in DRD2, ANKK1,  
480 TTC12 and NCAM1 to alcohol dependence in independent case control and  
481 family samples. *Hum Mol Genet* **16**, 2844-53 (2007).
- 482 37. Gelernter, J. *et al.* Haplotype spanning TTC12 and ANKK1, flanked by the  
483 DRD2 and NCAM1 loci, is strongly associated to nicotine dependence in two  
484 distinct American populations. *Hum Mol Genet* **15**, 3498-507 (2006).
- 485 38. Treutlein, J. *et al.* Genetic association of the human corticotropin releasing  
486 hormone receptor 1 (CRHR1) with binge drinking and alcohol intake patterns  
487 in two independent samples. *Mol Psychiatry* **11**, 594-602 (2006).
- 488 39. Timpl, P. *et al.* Impaired stress response and reduced anxiety in mice lacking a  
489 functional corticotropin-releasing hormone receptor 1. *Nat Genet* **19**, 162-6  
490 (1998).
- 491 40. Ruggeri, B. *et al.* Association of Protein Phosphatase PPM1G With Alcohol  
492 Use Disorder and Brain Activity During Behavioral Control in a Genome-  
493 Wide Methylation Analysis. *Am J Psychiatry* **172**, 543-52 (2015).
- 494 41. Wang, J., Vasaikar, S., Shi, Z., Greer, M. & Zhang, B. WebGestalt 2017: a  
495 more comprehensive, powerful, flexible and interactive gene set enrichment  
496 analysis toolkit. *Nucleic Acids Res* **45**, W130-W137 (2017).
- 497 42. Gonzalez, D.A. *et al.* The Arf6 activator Efa6/PSD3 confers regional  
498 specificity and modulates ethanol consumption in Drosophila and humans.  
499 *Mol Psychiatry* **23**, 621-628 (2018).
- 500 43. Ojelade, S.A. *et al.* Rsu1 regulates ethanol consumption in Drosophila and  
501 humans. *Proc Natl Acad Sci U S A* **112**, E4085-93 (2015).
- 502 44. Rademakers, R., Cruts, M. & van Broeckhoven, C. The role of tau (MAPT) in  
503 frontotemporal dementia and related tauopathies. *Hum Mutat* **24**, 277-95  
504 (2004).
- 505 45. Higashi, Y. *et al.* Influence of extracellular zinc on M1 microglial activation.  
506 *Sci Rep* **7**, 43778 (2017).
- 507 46. Chen, G. *et al.* Striatal involvement in human alcoholism and alcohol  
508 consumption, and withdrawal in animal models. *Alcohol Clin Exp Res* **35**,  
509 1739-48 (2011).
- 510 47. Okada, N. *et al.* Abnormal asymmetries in subcortical brain volume in  
511 schizophrenia. *Mol Psychiatry* **21**, 1460-6 (2016).
- 512 48. van Erp, T.G. *et al.* Subcortical brain volume abnormalities in 2028  
513 individuals with schizophrenia and 2540 healthy controls via the ENIGMA  
514 consortium. *Mol Psychiatry* **21**, 547-53 (2016).
- 515 49. Meyers, J.L. *et al.* The association between DRD2/ANKK1 and genetically  
516 informed measures of alcohol use and problems. *Addict Biol* **18**, 523-36  
517 (2013).

- 518 50. Logrip, M.L., Barak, S., Warnault, V. & Ron, D. Corticostriatal BDNF and  
519 alcohol addiction. *Brain Res* **1628**, 60-7 (2015).
- 520 51. Boschen, K.E., Criss, K.J., Palamarchouk, V., Roth, T.L. & Klintsova, A.Y.  
521 Effects of developmental alcohol exposure vs. intubation stress on BDNF and  
522 TrkB expression in the hippocampus and frontal cortex of neonatal rats. *Int J*  
523 *Dev Neurosci* **43**, 16-24 (2015).
- 524 52. Monaco, A. *et al.* A complex network approach reveals a pivotal substructure  
525 of genes linked to schizophrenia. *PLoS One* **13**, e0190110 (2018).
- 526 53. Nielsen, S.M., Toftdahl, N.G., Nordentoft, M. & Hjorthoj, C. Association  
527 between alcohol, cannabis, and other illicit substance abuse and risk of  
528 developing schizophrenia: a nationwide population based register study.  
529 *Psychol Med* **47**, 1668-1677 (2017).
- 530 54. Nivard, M.G. *et al.* Connecting the dots, genome-wide association studies in  
531 substance use. *Mol Psychiatry* **21**, 733-5 (2016).
- 532 55. Gaziano, J.M. *et al.* Moderate alcohol intake, increased levels of high-density  
533 lipoprotein and its subfractions, and decreased risk of myocardial infarction. *N*  
534 *Engl J Med* **329**, 1829-34 (1993).
- 535 56. Linn, S. *et al.* High-density lipoprotein cholesterol and alcohol consumption in  
536 US white and black adults: data from NHANES II. *Am J Public Health* **83**,  
537 811-6 (1993).
- 538 57. Vu, K.N. *et al.* Causal Role of Alcohol Consumption in an Improved Lipid  
539 Profile: The Atherosclerosis Risk in Communities (ARIC) Study. *PLoS One*  
540 **11**, e0148765 (2016).
- 541 58. Chaput, J.P., McNeil, J., Despres, J.P., Bouchard, C. & Tremblay, A. Short  
542 sleep duration is associated with greater alcohol consumption in adults.  
543 *Appetite* **59**, 650-5 (2012).
- 544 59. Bagnardi, V. *et al.* Alcohol consumption and site-specific cancer risk: a  
545 comprehensive dose-response meta-analysis. *Br J Cancer* **112**, 580-93 (2015).
- 546 60. Bycroft, C. *et al.* The UK Biobank resource with deep phenotyping and  
547 genomic data. *Nature* **562**, 203-209 (2018).
- 548 61. Boniface, S., Kneale, J. & Shelton, N. Drinking pattern is more strongly  
549 associated with under-reporting of alcohol consumption than socio-  
550 demographic factors: evidence from a mixed-methods study. *BMC Public*  
551 *Health* **14**, 1297 (2014).
- 552 62. Greenfield, T.K. & Kerr, W.C. Alcohol measurement methodology in  
553 epidemiology: recent advances and opportunities. *Addiction* **103**, 1082-99  
554 (2008).
- 555 63. Hambrecht, M. & Hafner, H. Substance abuse and the onset of schizophrenia.  
556 *Biol Psychiatry* **40**, 1155-63 (1996).
- 557

558 **Figure 1. Manhattan plot showing  $P$ -values from discovery genome-wide**  
559 **association meta-analysis with alcohol intake (g/d) among 480,842 individuals**  
560 **across UK Biobank, AlcGen and CHARGE+, excluding known variants. The  $P$ -**  
561 **value was computed using inverse variance fixed effects models. The y axis shows the**  
562  **$-\log_{10} P$  values and the x axis shows their chromosomal positions. Horizontal blue**  
563 **line represents the threshold of  $P = 5 \times 10^{-9}$ .**  
564  
565  
566

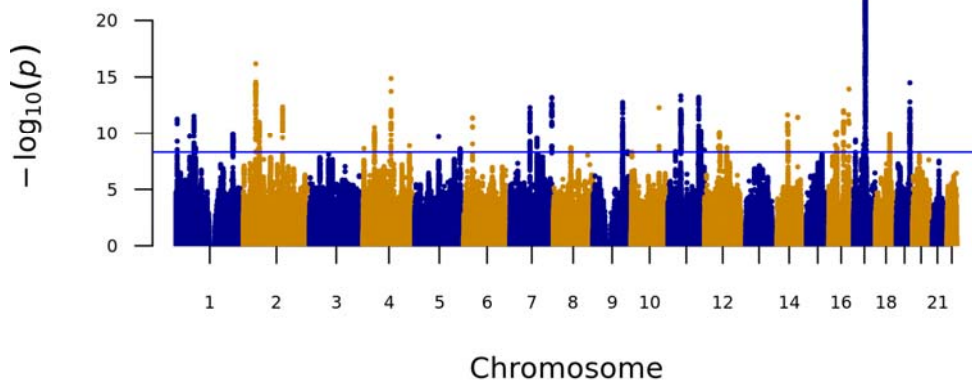

567



568 **Figure 2. Association of alcohol intake loci with other traits.** Plot shows results  
569 from associations with other traits which were extracted from the PhenoScanner  
570 database for the 46 novel sentinel SNPs including proxies in Linkage Disequilibrium  
571 ( $r^2 \geq 0.8$ ) with genome-wide significant associations.

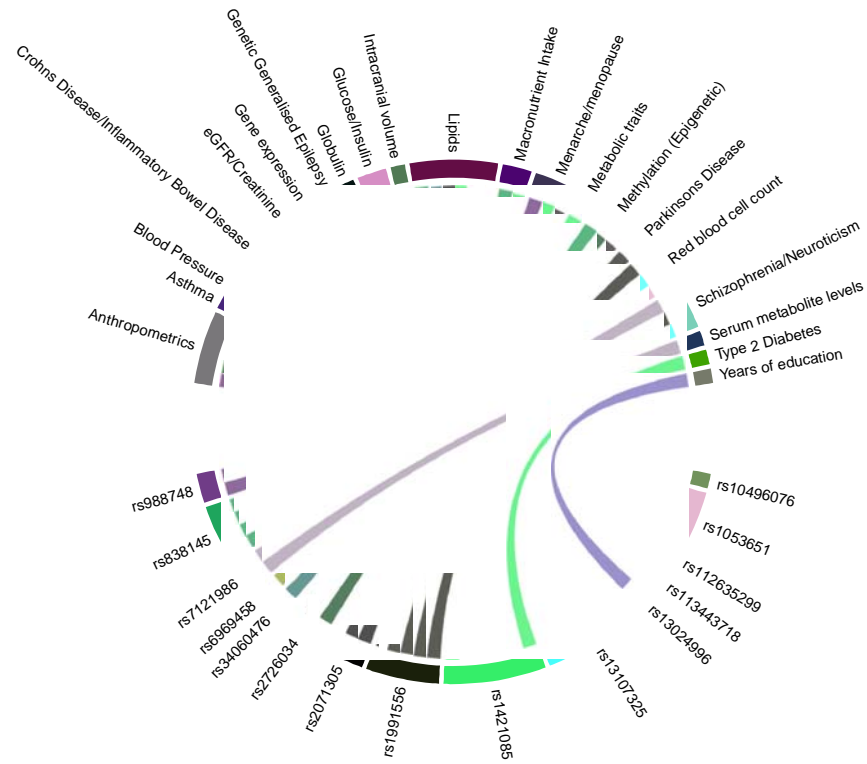

572  
573  
574

575 **Figure 3. Mediation effect of bilateral putamen on the relationship between SNP**  
576 **rs13107325 and alcohol intake.** Left putamen is indicated by the green color  
577 whereas the right putamen by the red. a presents the association between rs13107325  
578 and putamen, b is the association between putamen and alcohol consumption, c the  
579 association of rs13107325 and alcohol consumption, c' is the association between  
580 rs13107325 and alcohol consumption after excluding the effect of putamen, and ab is  
581 the mediation effect. The significance of the effect is based on bootstrapping. We  
582 provide the z-statistic for each relationship combined with *P*-values (\*\* as *P* < 0.005,  
583 \* as *P* < 0.1).  
584  
585

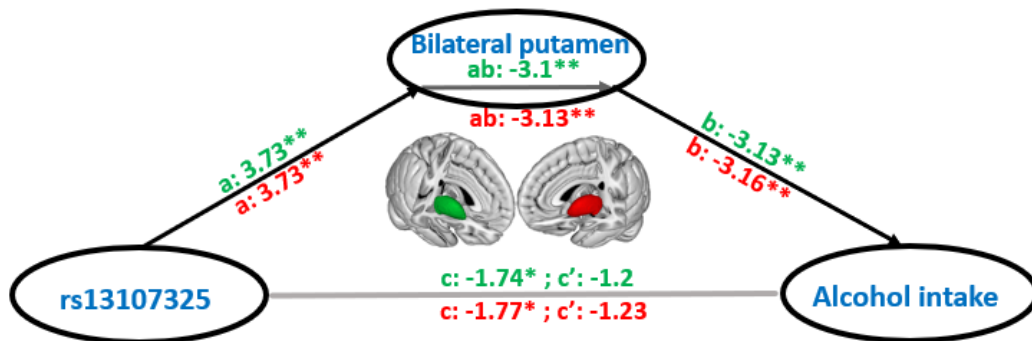

586  
587  
588  
589  
590  
591  
592

593 **Figure 4. Comparison of *Zip8* alcohol phenotypes in *Drosophila*.** Flies were  
594 exposed to 100/50 Ethanol/Air vapor for 30 min for exposure 1, and the time to 50%  
595 loss of righting was determined (ST-50, sedation time). After recovery on food for 4  
596 hours, flies were re-exposed to the same vapors, and the second ST-50 recorded (left  
597 side). The resulting increase in ST-50, i.e. tolerance, is shown on the right. In a)  
598 overexpressed human *hZIP8* in *ics*-expressing cells flies are compared against  
599 controls whereas in b) knockdown of the fly ortholog *dZip71B* is compared against  
600 controls. In c) flies carrying two transposon insertions in the endogenous *dZip71B*  
601 gene are compared against controls. Significance levels: \*\*\* $P < 0.001$ , \*\* $P < 0.01$ ,  
602 \*\* $P < 0.05$ . Actual  $P$ -values are presented in the text

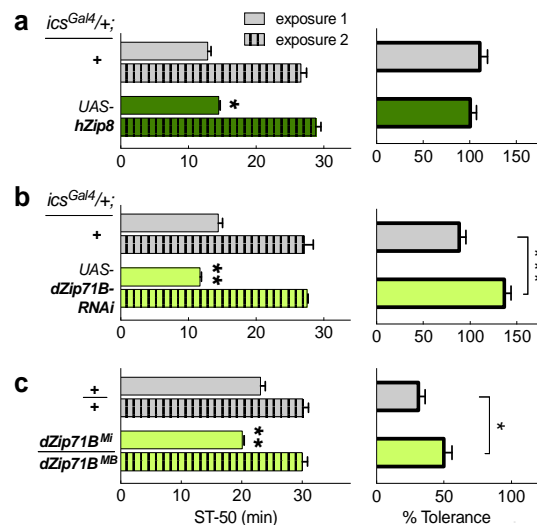

603  
604

605 **ONLINE METHODS**

606

607 **UK Biobank data**

608 We conducted a Genome Wide Association Study (GWAS) analysis among 458,577  
609 UKB participants of European descent, identified from a combination of self-reported  
610 and genetic data. The details of the selection of the participants has been described  
611 elsewhere<sup>14</sup>. These comprise 408,951 individuals from UKB genotyped at 825,927  
612 variants with a custom Affymetrix UK Biobank Axiom Array chip and 49,626  
613 individuals genotyped at 807,411 variants with a custom Affymetrix UK BiLEVE  
614 Axiom Array chip from the UK BiLEVE study, which is a subset of UKB. For our  
615 analyses, we used SNPs imputed centrally by UKB using the Haplotype Reference  
616 Consortium (HRC) panel.

617

618 *Alcohol intake*

619 We calculated the alcohol intake as grams of alcohol per day (g/d) based on self-  
620 reported alcohol drinking from the touch-screen questionnaire. The quantity of each  
621 type of drink (red wine, white wine, beer/cider, fortified wine, spirits) was multiplied  
622 by its standard drink size and reference alcohol content. Drink-specific intake during  
623 the reported drinking period (a week for frequent drinkers defined as: daily or almost  
624 daily/once or twice a week/three or four times a week; or a month for occasional  
625 drinkers defined as: one to three times a month/special occasions only) was summed  
626 up and converted to g/d alcohol intake for all participants with complete response to  
627 the quantitative drinking questions. The alcohol intake for participants with  
628 incomplete response was imputed by bootstrap resampling from the complete  
629 responses, stratified by drinking frequency (occasional or frequent) and sex.

630

631 Participants were defined as life-time non-drinkers if they reported ‘never’ on the  
632 question on alcohol drinking frequency (UKB field 1558) and ‘no’ for the question on  
633 former drinker (UKB field 3731); they were excluded from further analysis.  
634 Participants with daily alcohol consumption > 500 grams we considered outliers and  
635 they were dropped from the analyses. We also excluded participants with missing  
636 covariates, leaving data on 404,732 individuals. We log<sub>10</sub> transformed g/d alcohol  
637 and sex-specific residuals were derived from the regression of log<sub>10</sub> transformed g/d  
638 alcohol on age, age<sup>2</sup>, genotyping chip and weight.

639

640 **UKB genetic analysis**

641 We performed linear mixed modeling using BOLT-LMM software<sup>64</sup>, under an  
642 additive genetic model, for associations of measured and imputed SNPs with alcohol  
643 consumption (sex-specific residuals of the log<sub>10</sub> transformed g/d variable). Model  
644 building was based on SNPs with MAF > 5%, call rate > 98.5% and HWE P > 1 x 10<sup>-</sup>

645 <sup>6</sup>. SNPs were imputed using the HRC panel with imputation quality INFO score > 0.1.  
646 We estimated the LD score regression (LDSR) intercept to assess the degree of  
647 genomic inflation beyond polygenicity as well as the lambda inflation factor  $\lambda_{GC}$ <sup>65</sup>.

#### 648 **The Alcohol Genome-Wide Consortium (AlcGen) and the Cohorts for Heart and** 649 **Aging Research in Genomic Epidemiology Plus (CHARGE+) consortia**

650 We analyzed available GWAS data from 25 independent studies (N=76,111) from the  
651 AlcGen and the CHARGE+ consortia. All study participants were of reported  
652 European ancestry and data were imputed to either the 1000 Genome Project or the  
653 HRC panel. Alcohol intake in g/d was computed and the log<sub>10</sub> transformed residuals  
654 were analyzed as described above. Study names, cohort information and general study  
655 methods are included in Supplementary Table 2 and 3.

656 All studies were centrally quality-controlled using easyQC<sup>66</sup>. Finally, we analyzed  
657 data on ~7.1 M SNPs at MAF >1% and imputation quality score (Impute [Info score]  
658 or Mach [r<sup>2</sup>]) > 0.3. Genomic control (GC) was applied at study level. We synthesized  
659 the available GWAS using a fixed effects inverse variance weighted meta-analysis  
660 and summary estimates were derived for AlcGen and CHARGE+.

#### 661 **One-stage meta-analysis**

662 We performed a one-stage meta-analysis applying a fixed-effects inverse variance  
663 weighted meta-analysis using METAL<sup>67</sup> to obtain summary results from the UKB and  
664 and the AlcGen plus CHARGE+ GWAS, for up to N=480,842 participants and ~7.1  
665 M SNPs with MAF ≥ 1% for variants present in both the UKB data and AlcGen and  
666 CHARGE+ meta-analysis. The LDSR intercept (standard error), in the discovery  
667 meta-analysis was 1.05 and no further correction was applied.

668

#### 669 **Previously reported (known) SNPs**

670 We looked up in the GWAS catalog (<http://www.ebi.ac.uk/gwas/>) and identified 17  
671 SNPs that associated with alcohol consumption at genome-wide significance level ( $P$   
672 <  $5 \times 10^{-8}$ ). We enhanced the list by reference to a recent GWAS by Clarke et al<sup>6</sup> that  
673 was not covered by the GWAS catalog at the time of the analysis, reporting 14  
674 additional rare and common novel SNPs. Together with a SNP in *RASGRF2* shown to  
675 be associated with alcohol-induced reinforcement<sup>68</sup>, we found 31 previously reported  
676 alcohol consumption related SNPs.

677

#### 678 **Novel loci**

679 According to locus definition of i) SNPs within ±500kb distance of each other; ii)  
680 SNPs in linkage disequilibrium LD ( $r^2 > 0.1$ ) calculated with PLINK, we augmented  
681 the list of known SNPs to all SNPs present within our data, not contained within the

682 previously published loci. We further excluded SNPs in the HLA region  
683 (chromosome 6, 25-34Mb) due to its complex LD structure. We performed LD  
684 clumping in PLINK on 4,515 unknown SNPs with  $P < 1 \times 10^{-8}$  using an  $r^2 > 0.1$  and  
685 distance threshold of 500kb. We further grouped the lead SNPs within 500kb from  
686 each other into the same loci and selected the SNP with smallest  $P$ -value from the  
687 locus as sentinel SNP.

688 To report a SNP as novel signal of association with alcohol consumption:

- 689 i) the sentinel SNP has  $P < 5 \times 10^{-9}$  in the one-stage meta-analysis;
- 690 ii) the sentinel SNP is strongly associated ( $P < 5 \times 10^{-7}$ ) in the UKB GWAS  
691 alone;
- 692 iii) the sentinel SNP has concordant direction of effect between UKB and  
693 AlcGen and CHARGE+ datasets;
- 694 iv) The sentinel SNP is not located within any of the previously reported loci

695 We selected the above criteria i) to iii) to minimize false positive findings including  
696 use of a conservative one-stage  $P$ -value threshold that is an order of magnitude more  
697 stringent than a genome-wide significance  $P$ -value. (The threshold of  $P < 5 \times 10^{-9}$   
698 has been proposed e.g. for whole-genome sequencing-based studies.) This approach led us  
699 to the identification of 46 sentinel SNPs in total.

700

### 701 **Conditional analysis**

702 We conducted locus-specific conditional analysis using the GCTA (Genome-wide  
703 Complex Trait Analysis) software (<http://cnsgenomics.com/software/gcta>). For each  
704 of the 46 novel sentinel SNPs, we obtained conditional analysis results for the SNPs  
705 with MAF>1% and within 500kb from the sentinel SNP after conditioning on the  
706 sentinel SNP. The meta-analysis results of the GWAS in UKB, AlcGen and  
707 CHARGE+ were used as input summary statistics and the individual-level genetic  
708 data from UKB were used as the reference sample. Results for a SNP were considered  
709 conditionally significant if the difference between the conditional  $P$ -value and the  
710 original  $P$ -value is greater than 1.5-fold ( $-\log_{10}P / -\log_{10}(P_{\text{conditional}}) > 1.5$  and the  
711 conditional  $P$ -value is smaller than  $5 \times 10^{-8}$ .

712

### 713 **Gene expression analyses**

714 To analyze the impact of genetic variants on expression of neighboring genes and  
715 identify expression quantitative trait loci (*cis*-eQTLs; i.e., SNPs associated with  
716 differences in local gene expression), we used two publicly available databases, the  
717 Genotype-Tissue Expression (GTEx) database<sup>69</sup> and the UK Brain Expression  
718 Consortium (UKBEC) dataset<sup>70</sup>. We searched these databases for significant variant-  
719 transcripts pairs for genes within 1Mb of each input SNP.



720 With the GTEx database, we tested for *cis*-eQTL effects in 48 tissues from 620  
721 donors. The data described herein were obtained from the GTEx Portal, Release: V7  
722 and used FastQTL<sup>71</sup>, to map SNPs to gene-level expression data and calculate q-  
723 values based on beta distribution-adjusted empirical *P*-values<sup>72</sup>. A false discovery rate  
724 (FDR) threshold of  $\leq 0.05$  was applied to identify genes with a significant eQTL. The  
725 effect size, defined as the slope of the linear regression, was computed in a  
726 normalized space (normalized effect size (NES)), where magnitude has no direct  
727 biological interpretation. Here, NES reflects the effects of our GWAS A1 alleles (that  
728 are not necessarily the alternative alleles relative to the reference alleles, as reported  
729 in the GTEx database). Supplementary Table 12 lists transcripts-SNPs associations  
730 with significant eQTL effects.

731 With the UKBEC dataset that comprises 134 brains (<http://www.braineac.org/>), we  
732 searched for *cis*-eQTLs in 10 brain regions, including the cerebellar cortex (CRBL),  
733 frontal cortex (FCTX), hippocampus (HIPPO), medulla (specifically inferior olivary  
734 nucleus, MEDU), occipital cortex (specifically primary visual cortex, OCTX),  
735 putamen (PUTM), substantia nigra (SNIG), thalamus (THAL), temporal cortex  
736 (TCTX) and intralobular white matter (WHMT), as well as across all brain tissues  
737 (aveALL). MatrixEQTL<sup>73</sup> generated *P*-values for each expression profile (either  
738 exon-level or gene-level) against the respective SNP were obtained for the 10  
739 different tissues and overall (aveALL). **Supplementary Table 13** lists transcripts-  
740 SNPs associations with a eQTL *P*-value  $< 0.0045$  in at least one brain tissue.  
741 Subsequent data analysis was performed in R (<http://www.R-project.org/>).

742 We carried out over-representation enrichment analysis using the list of 146 GTEx  
743 eQTL genes. Ingenuity pathway analysis (IPA®, QIAGEN Inc.) was performed on  
744 this list using ontology annotations from all available databases except those derived  
745 from low-confidence computational predictions.

746

#### 747 **Magnetic Resonance Imaging Data**

748 We used the most recent release of magnetic resonance imaging (MRI) data on brain,  
749 heart and liver for UKB participants to investigate genetic associations with the 46  
750 novel SNPs for alcohol consumption.

751

#### 752 **Brain imaging**

753

##### 754 *Brain MRI acquisition and pre-processing*

755 We used the T1 data from UKB to elucidate volumetric brain structures, including the  
756 cortical and the sub-cortical areas. The T1 data were acquired and pre-processed  
757 centrally by UKB. The brain regions were defined by combining the Harvard-Oxford

758 cortical and subcortical atlases<sup>74</sup> (<https://fsl.fmrib.ox.ac.uk/fsl/fslwiki/Atlases>) and the  
759 Diedrichsen cerebellar atlas<sup>75</sup> (<http://www.diedrichsenlab.org/imaging/propatlas.htm>).  
760 FAST (FMRIB's Automated Segmentation Tool)<sup>76</sup> was then used to estimate the grey  
761 matter partial volume within each brain region. Subcortical region volumes were also  
762 modelled by using FIRST (FMRIB's Integrated Registration and Segmentation Tool).  
763 More details about the MRI scanning protocol and pre-processing has been provided  
764 in UKB documentation ([https://biobank.ctsu.ox.ac.uk/crystal/docs/brain\\_mri.pdf](https://biobank.ctsu.ox.ac.uk/crystal/docs/brain_mri.pdf)).

765

#### 766 *Association Analyses*

767 We performed association analyses on N = 9,705 individuals between all novel SNPs  
768 and the grey matter volume of brain regions using Pearson correlation, adjusting for  
769 age, age<sup>2</sup>, sex, age × sex, age<sup>2</sup> × sex, and head size. All, brain volume features, log  
770 transformed alcohol intake data (g/d), and the confounders were firstly transformed by  
771 using a rank-based inverse Gaussian transformation. Significance levels were set at *P*  
772 < 0.05 adjusted using the false-discovery rate method for multiple comparisons.

773

#### 774 *Mediation analysis*

775 To assess if the effect of a SNP on alcohol consumption is mediated through a brain  
776 region, we performed a single-level mediation analysis based on a standard three-  
777 variable path model (SNP-brain region-alcohol consumption) with corrected and  
778 accelerated percentile bootstrapping 10,000 times to calculate the significance of the  
779 mediation effect. We considered as mediator variable the grey matter volume of brain  
780 regions that had a significant association on alcohol consumption. We calculated the  
781 significance of path a, path b and a\*b mediation (SNP-brain region-alcohol  
782 consumption) using a multilevel mediation and moderation (M3) toolbox<sup>77,78</sup>

783

### 784 **Cardiac Imaging**

785

#### 786 *Cardiac MRI acquisition and pre-processing*

787 Details of the cardiac image acquisition in UKB are reported previously<sup>79</sup>. Cardiac  
788 MRI was acquired using a clinical wide bore 1.5T scanner (MAGNETOM Aera,  
789 Syngo Platform VD13A, Siemens Healthcare, Erlangen, Germany) with 48 receiver  
790 channels, a 45 mT/m and 200 T/m/s gradient system, an 18-channel anterior body  
791 surface coil used in combination with 12 elements of an integrated 32 element spine  
792 coil and electrocardiogram gating for cardiac synchronization. A two-dimensional  
793 short-axis cardiac MRI was obtained using a balanced steady state free precession to  
794 cover the entire left and right ventricle (echo time, 1.10msec; repetition time,  
795 2.6msec; flip angle, 80°; slice thickness, 8mm with 2mm gap; typical field of view,  
796 380×252mm; matrix size, 208×187, acquisition of 1 slice per breath-hold).

797 The cardiac images were segmented to provide left ventricular mass (LVM), left end-  
798 diastolic (LVEDV), left end-systolic volume (LVESV), and right end-diastolic  
799 (RVEDV) and right end-systolic volume (RVESV) using a fully convolutional  
800 network as described previously<sup>80</sup>. Left (LVEF) and right ventricular ejection fraction  
801 (RVEF) were derived from  $(LVEDV-LVESV)/LVEDV \times 100$  and  $(RVEDV-$   
802  $RVESV)/RVEDV \times 100$ , respectively.

803

#### 804 *Association Analyses*

805 To test associations between cardiac MRI measures and alcohol consumption-related  
806 SNPs, we carried out a regression of LVM, LVEDV, LVEF, RVEDV, and RVEF  
807 onto each of the 46 SNPs adjusting for age, sex, height, weight, hypertension,  
808 diabetes, and smoking history. Significance levels were set at  $P < 0.05$  adjusted using  
809 the false-discovery rate method for multiple comparisons.

810

#### 811 **Liver Imaging**

##### 812 *Liver MRI acquisition and pre-processing*

813 Details of the liver image acquisition protocol have been reported previously<sup>81</sup>.  
814 Briefly, all participants were scanned in a Siemens MAGNETOM Aera 1.5-T MRI  
815 scanner (Siemens Healthineers, Erlangen, Germany) using a 6-minute dual-echo  
816 Dixon Vibe protocol, providing a water and fat separated volumetric data set for fat  
817 and muscle covering neck to knees. For liver proton density fat fraction (PDFF)  
818 quantification, an additional single multi-echo gradient slice was acquired over the  
819 liver. Liver images were analysed by computing specific ROI for water, fat and T2\*  
820 by magnitude-based chemical shift technique with a 6-peak lipid model, correcting for  
821 T1 and T2\*

822

##### 823 *Association Analyses*

824

825 We performed association analyses between 46 alcohol consumption-related SNPs  
826 and liver PDFF (%), from 8,372 samples, using a linear regression model adjusting  
827 for age, age<sup>2</sup>, sex, T2D, BMI, genotyping chip and first three PCs. Liver PDFF was  
828 firstly transformed by using a rank-based inverse transformation. Significance levels  
829 were set at  $P < 0.05$  adjusted using the false-discovery rate method for multiple  
830 comparisons.

831

832

#### 833 ***Drosophila* experiments**

834 Flies were kept on standard cornmeal/molasses fly food in a 12:12hr light:dark cycle  
835 at 25°C. Transgenic flies were obtained from the Bloomington *Drosophila* Stock  
836 Center: *UAS-hZip8* BL#66125, *UAS-dZIP71B-TRiP-RNAi*<sup>HMC04064</sup> BL#55376,

837 *dZip71B*<sup>M113940</sup> BL#59234, and *dZip71B*<sup>MB11703</sup> BL#29928. For behavioral  
838 experiments, crosses were set up such that experimental and control flies were sibling  
839 progeny from a cross, and both were therefore in the same hybrid genetic background  
840 (*w Berlin / unknown*). Flies aged 1-5 days of adult age were collected, exposed to  
841 100/50 (flowrates) ethanol/air vapor in the Booze-o-Mat 2 days later, and their loss of  
842 righting determined by slight tapping, as described<sup>82</sup>. For tolerance, flies were put  
843 back onto regular food after a 30-min initial exposure, and were then re-exposed to  
844 the same vapor 4 hours later. Note that tolerance is not connected to initial  
845 sensitivity, and flies naively sensitive to ethanol-induced sedation can have no, or a  
846 reduced tolerance phenotype. Flies overexpressing *hZip8* (and their sibling controls)  
847 were placed at 28°C for two days to increase the expression levels of the transgene, as  
848 we did not detect a phenotype when they were kept at 25°C (data not shown). Data  
849 from experimental and control flies were compared by Student's t-tests.

850

#### 851 **Effects on other traits and diseases**

852 We queried SNPs against GWAS results included in PhenoScanner, to investigate  
853 cross-trait effects, extracting all association results with genome-wide significance at  
854  $P < 5 \times 10^{-8}$  for all SNPs in high LD ( $r^2 \geq 0.8$ ) with the 46 sentinel novel SNPs, to  
855 highlight the loci with strongest evidence of association with other traits. At the gene  
856 level, overrepresentation enrichment analysis (ORA) with WebGestalt<sup>41</sup> on the nearest  
857 genes to all alcohol intake loci was carried out.

858 The genetic correlations between alcohol consumption and 235 other traits and  
859 diseases were obtained in the online software LD Hub. LD hub is a centralized  
860 database of summary-level GWAS results and a web interface for LD score regression  
861 analysis

862 To estimate the potential causal effect of alcohol consumption-related variants on  
863 schizophrenia, we performed a Mendelian randomization analysis utilizing publicly  
864 available GWAS data on schizophrenia and the Mendelian randomization package in  
865 R. The effect was estimated using the inverse-variance weighted (IVW) method.  
866 Pleiotropy was tested by applying the MR-Egger regression method and heterogeneity  
867 statistics were obtained. In presence of heterogeneity the random effects inverse-  
868 variance method was applied<sup>83</sup>.

#### 869 **Genetic risk scores and percentage of variance explained**

870 We calculated an unbiased weighted genetic risk score in 14,004 unrelated  
871 participants in Airwave, an independent cohort with high quality HRC imputed  
872 genetic data<sup>33</sup>. We used as weights the beta coefficients of the meta-analysis. We  
873 assessed the association of the GRS with alcohol intake and calculated the alcohol  
874 consumption levels for individuals in the top vs the bottom quintiles of the

875 distribution. To calculate the percent of variance of alcohol consumption explained by  
876 genetic variants, we generated the residuals from a regression of alcohol consumption  
877 in Airwave. We then fit a second linear model for the trait residuals with all novel and  
878 known variants plus the top 10 principal components, and estimated the percentage  
879 variance of the dependent variable explained by the variants.

880

## 881 **References**

- 882 64. Loh, P.R. *et al.* Efficient Bayesian mixed-model analysis increases association  
883 power in large cohorts. *Nat Genet* **47**, 284-90 (2015).
- 884 65. Georgiopoulos, G. & Evangelou, E. Power considerations for lambda inflation  
885 factor in meta-analyses of genome-wide association studies. *Genet Res*  
886 (*Camb*) **98**, e9 (2016).
- 887 66. Winkler, T.W. *et al.* Quality control and conduct of genome-wide association  
888 meta-analyses. *Nat Protoc* **9**, 1192-212 (2014).
- 889 67. Willer, C.J., Li, Y. & Abecasis, G.R. METAL: fast and efficient meta-analysis  
890 of genomewide association scans. *Bioinformatics* **26**, 2190-1 (2010).
- 891 68. Stacey, D. *et al.* RASGRF2 regulates alcohol-induced reinforcement by  
892 influencing mesolimbic dopamine neuron activity and dopamine release. *Proc*  
893 *Natl Acad Sci U S A* **109**, 21128-33 (2012).
- 894 69. GTEx Consortium. The Genotype-Tissue Expression (GTEx) project. *Nat*  
895 *Genet* **45**, 580-5 (2013).
- 896 70. Ramasamy, A. *et al.* Genetic variability in the regulation of gene expression in  
897 ten regions of the human brain. *Nat Neurosci* **17**, 1418-1428 (2014).
- 898 71. Ongen, H., Buil, A., Brown, A.A., Dermitzakis, E.T. & Delaneau, O. Fast and  
899 efficient QTL mapper for thousands of molecular phenotypes. *Bioinformatics*  
900 **32**, 1479-85 (2016).
- 901 72. Storey, J.D. & Tibshirani, R. Statistical significance for genomewide studies.  
902 *Proc Natl Acad Sci U S A* **100**, 9440-5 (2003).
- 903 73. Shabalin, A.A. Matrix eQTL: ultra fast eQTL analysis via large matrix  
904 operations. *Bioinformatics* **28**, 1353-8 (2012).
- 905 74. Brown, C.A. *et al.* Development, validation and application of a new fornix  
906 template for studies of aging and preclinical Alzheimer's disease. *Neuroimage*  
907 *Clin* **13**, 106-115 (2017).
- 908 75. Diedrichsen, J. *et al.* Imaging the deep cerebellar nuclei: a probabilistic atlas  
909 and normalization procedure. *Neuroimage* **54**, 1786-94 (2011).
- 910 76. Zhang, Y., Brady, M. & Smith, S. Segmentation of brain MR images through  
911 a hidden Markov random field model and the expectation-maximization  
912 algorithm. *IEEE Trans Med Imaging* **20**, 45-57 (2001).
- 913 77. Wager, T.D., Davidson, M.L., Hughes, B.L., Lindquist, M.A. & Ochsner,  
914 K.N. Prefrontal-subcortical pathways mediating successful emotion  
915 regulation. *Neuron* **59**, 1037-50 (2008).
- 916 78. Wager, T.D. *et al.* Brain mediators of cardiovascular responses to social threat:  
917 part I: Reciprocal dorsal and ventral sub-regions of the medial prefrontal  
918 cortex and heart-rate reactivity. *Neuroimage* **47**, 821-35 (2009).

- 919 79. Petersen, S.E. *et al.* UK Biobank's cardiovascular magnetic resonance  
920 protocol. *J Cardiovasc Magn Reson* **18**, 8 (2016).
- 921 80. Bai, W. *et al.* Automated cardiovascular magnetic resonance image analysis  
922 with fully convolutional networks. *J Cardiovasc Magn Reson* **20**, 65 (2018).
- 923 81. Linge, J. *et al.* Body Composition Profiling in the UK Biobank Imaging Study.  
924 *Obesity (Silver Spring)* (2018).
- 925 82. Peru, Y.C.d.P.R.L. *et al.* Adult neuronal Arf6 controls ethanol-induced  
926 behavior with Arfaptin downstream of Rac1 and RhoGAP18B. *J Neurosci* **32**,  
927 17706-13 (2012).
- 928 83. Dimou, N.L. & Tsilidis, K.K. A Primer in Mendelian Randomization  
929 Methodology with a Focus on Utilizing Published Summary Association Data.  
930 *Methods Mol Biol* **1793**, 211-230 (2018).



**Table 1: Association results of 46 novel alcohol variants identified through the meta-analysis of UK Biobank and AlcGen and CHARGE+. Results are ordered by P-value of combined analysis.**

| Nearest_Gene                        | leadSNP        |               | CP           | EA | EAF  | Combined |       |         | UKB    |       |         | AlcGen and CHARGE+ |       |         |
|-------------------------------------|----------------|---------------|--------------|----|------|----------|-------|---------|--------|-------|---------|--------------------|-------|---------|
|                                     | Annotated Gene | rsID_LEAD_SNP |              |    |      | BETA     | SE    | P       | BETA   | SE    | P       | BETA               | SE    | P       |
| MAPT                                | STH            | rs1991556     | 17:44083402  | A  | 0.22 | -0.012   | 0.001 | 4.5E-23 | -0.013 | 0.001 | 2.4E-21 | -0.011             | 0.004 | 4.0E-03 |
| RP11-89K21.1                        | SIX3           | rs1004787     | 2:45159091   | A  | 0.54 | 0.009    | 0.001 | 6.7E-17 | 0.009  | 0.001 | 1.1E-15 | 0.007              | 0.003 | 1.4E-02 |
| SLC39A8                             | SLC39A8        | rs13107325    | 4:103188709  | T  | 0.07 | -0.016   | 0.002 | 1.3E-15 | -0.017 | 0.002 | 4.8E-16 | -0.006             | 0.006 | 3.6E-01 |
| IZUMO1, RASIP1, FUT1                | IZUMO1         | rs838145      | 19:49248730  | A  | 0.55 | -0.008   | 0.001 | 3.2E-15 | -0.009 | 0.001 | 2.4E-15 | -0.004             | 0.003 | 1.7E-01 |
| na                                  | PSMD7          | rs1104608     | 16:73912588  | C  | 0.43 | -0.008   | 0.001 | 1.2E-14 | -0.009 | 0.001 | 4.9E-15 | -0.003             | 0.003 | 2.5E-01 |
| MYBPC3                              | MYBPC3         | rs2071305     | 11:47370957  | A  | 0.69 | 0.009    | 0.001 | 4.5E-14 | 0.009  | 0.001 | 3.9E-13 | 0.007              | 0.003 | 3.1E-02 |
| na                                  | DRD2           | rs7121986     | 11:113355444 | T  | 0.37 | -0.008   | 0.001 | 6.2E-14 | -0.008 | 0.001 | 1.3E-13 | -0.005             | 0.003 | 1.1E-01 |
| na                                  | DPP6           | rs6969458     | 7:153489725  | A  | 0.47 | 0.008    | 0.001 | 6.4E-14 | 0.008  | 0.001 | 1.3E-12 | 0.007              | 0.003 | 1.5E-02 |
| RP11-308N19.1                       | ZNF462         | rs74424378    | 9:109331094  | T  | 0.76 | 0.009    | 0.001 | 1.7E-13 | 0.009  | 0.001 | 4.5E-13 | 0.006              | 0.003 | 8.4E-02 |
| ARHGAP15, ACO96558.1, RP11-570L15.2 | ARHGAP15       | rs13024996    | 2:144225215  | A  | 0.37 | -0.008   | 0.001 | 4.4E-13 | -0.008 | 0.001 | 6.6E-13 | -0.004             | 0.003 | 1.4E-01 |
| MLXIPL                              | MLXIPL         | rs34060476    | 7:73037956   | A  | 0.87 | -0.011   | 0.002 | 5.0E-13 | -0.012 | 0.002 | 1.4E-13 | -0.004             | 0.004 | 4.1E-01 |
| na                                  | FAM178A        | rs61873510    | 10:102626510 | T  | 0.33 | -0.008   | 0.001 | 5.1E-13 | -0.008 | 0.001 | 9.8E-12 | -0.008             | 0.003 | 1.7E-02 |
| FTO                                 | FTO            | rs1421085     | 16:53800954  | T  | 0.60 | 0.008    | 0.001 | 9.2E-13 | 0.007  | 0.001 | 1.7E-10 | 0.010              | 0.003 | 9.2E-04 |
| na                                  | PMFBP1         | rs11648570    | 16:72356964  | T  | 0.89 | -0.012   | 0.002 | 2.1E-12 | -0.011 | 0.002 | 1.5E-10 | -0.013             | 0.005 | 3.4E-03 |
| OTX2, RP11-1085N6.6                 | OTX2           | rs2277499     | 14:57271127  | T  | 0.34 | -0.008   | 0.001 | 2.2E-12 | -0.007 | 0.001 | 2.4E-09 | -0.012             | 0.003 | 9.1E-05 |
| PDE4B                               | PDE4B          | rs2310752     | 1:66392405   | A  | 0.43 | -0.007   | 0.001 | 2.8E-12 | -0.008 | 0.001 | 1.8E-11 | -0.006             | 0.003 | 4.2E-02 |
| SERPINA1                            | SERPINA1       | rs112635299   | 14:94838142  | T  | 0.02 | -0.025   | 0.004 | 3.7E-12 | -0.027 | 0.004 | 9.8E-12 | -0.017             | 0.010 | 9.9E-02 |
| na                                  | AJAP1          | rs780569      | 1:4569436    | A  | 0.71 | -0.008   | 0.001 | 5.2E-12 | -0.008 | 0.001 | 1.1E-11 | -0.005             | 0.003 | 1.2E-01 |
| na                                  | VRK2           | rs10496076    | 2:57942987   | T  | 0.37 | -0.007   | 0.001 | 9.7E-12 | -0.007 | 0.001 | 1.3E-09 | -0.009             | 0.003 | 1.6E-03 |
| ACTR10, C14orf37                    | ACTR10         | rs71414193    | 14:58685301  | A  | 0.19 | -0.009   | 0.001 | 1.8E-11 | -0.008 | 0.001 | 5.8E-09 | -0.013             | 0.004 | 4.5E-04 |
| BEND4                               | BEND4          | rs16854020    | 4:42117559   | A  | 0.13 | 0.010    | 0.002 | 2.9E-11 | 0.010  | 0.002 | 5.8E-09 | 0.016              | 0.005 | 6.4E-04 |
| na                                  | SORL1          | rs485425      | 11:121544984 | C  | 0.45 | -0.007   | 0.001 | 6.1E-11 | -0.007 | 0.001 | 7.3E-11 | -0.004             | 0.003 | 1.9E-01 |
| SEZ6L2                              | SEZ6L2         | rs113443718   | 16:29892184  | A  | 0.31 | -0.007   | 0.001 | 7.4E-11 | -0.008 | 0.001 | 4.5E-11 | -0.003             | 0.003 | 2.9E-01 |
| CBX5, RP11-968A15.2                 | CBX5           | rs57281063    | 12:54660427  | A  | 0.41 | 0.007    | 0.001 | 7.9E-11 | 0.007  | 0.001 | 1.8E-09 | 0.007              | 0.003 | 1.2E-02 |
| na                                  | TNRC6A         | rs72768626    | 16:24693048  | A  | 0.94 | 0.014    | 0.002 | 9.7E-11 | 0.015  | 0.002 | 1.7E-09 | 0.014              | 0.006 | 1.8E-02 |
| SYT14                               | SYT14          | rs227179      | 1:210216731  | A  | 0.59 | -0.007   | 0.001 | 1.1E-10 | -0.007 | 0.001 | 1.4E-09 | -0.006             | 0.003 | 2.8E-02 |
| TCF4                                | TCF4           | rs9320010     | 18:53053897  | A  | 0.60 | 0.007    | 0.001 | 1.1E-10 | 0.007  | 0.001 | 1.6E-09 | 0.007              | 0.003 | 2.2E-02 |
| SBK1                                | NPIP6          | rs2726034     | 16:28336882  | T  | 0.68 | 0.007    | 0.001 | 1.4E-10 | 0.007  | 0.001 | 1.1E-09 | 0.006              | 0.003 | 4.7E-02 |
| ANKRD36                             | ANKRD36        | rs13390019    | 2:97797680   | T  | 0.87 | 0.010    | 0.002 | 1.6E-10 | 0.011  | 0.002 | 7.0E-11 | 0.004              | 0.005 | 4.5E-01 |
| na                                  | ELAVL4         | rs7517344     | 1:50711961   | A  | 0.17 | 0.009    | 0.001 | 1.9E-10 | 0.008  | 0.001 | 2.5E-07 | 0.016              | 0.004 | 2.1E-05 |
| LINC00461                           | MEF2C          | rs4916723     | 5:87854395   | A  | 0.58 | 0.007    | 0.001 | 2.1E-10 | 0.007  | 0.001 | 5.1E-10 | 0.005              | 0.003 | 1.1E-01 |
| ARPC1B, ARPC1A                      | ARPC1B         | rs10249167    | 7:98980879   | A  | 0.87 | 0.010    | 0.002 | 2.9E-10 | 0.009  | 0.002 | 8.1E-08 | 0.015              | 0.004 | 3.8E-04 |
| EFNB3, WRAP53                       | EFNB3          | rs7640        | 17:7606722   | C  | 0.80 | 0.008    | 0.001 | 4.3E-10 | 0.009  | 0.001 | 1.3E-09 | 0.006              | 0.004 | 9.9E-02 |
| RP11-501C14.5                       | IGF2BP1        | rs4794015     | 17:47067826  | A  | 0.41 | 0.007    | 0.001 | 4.3E-10 | 0.006  | 0.001 | 5.4E-08 | 0.009              | 0.003 | 1.2E-03 |
| TCAP, PNMT, STARD3                  | TCAP           | rs1053651     | 17:37822311  | A  | 0.27 | -0.007   | 0.001 | 1.1E-09 | -0.008 | 0.001 | 8.4E-10 | -0.003             | 0.003 | 2.8E-01 |
| na                                  | AADAT          | rs7698119     | 4:171070910  | A  | 0.49 | -0.006   | 0.001 | 1.3E-09 | -0.006 | 0.001 | 1.6E-07 | -0.009             | 0.003 | 1.6E-03 |
| STAT6, ACO23237.1                   | STAT6          | rs12312693    | 12:57511734  | T  | 0.55 | -0.006   | 0.001 | 1.5E-09 | -0.006 | 0.001 | 9.5E-09 | -0.005             | 0.003 | 5.6E-02 |
| SCN8A                               | SCN8A          | rs7958704     | 12:51984349  | T  | 0.41 | -0.006   | 0.001 | 1.6E-09 | -0.006 | 0.001 | 1.7E-08 | -0.006             | 0.003 | 3.5E-02 |
| ACSS3                               | ACSS3          | rs11114787    | 12:81595700  | T  | 0.27 | 0.007    | 0.001 | 2.0E-09 | 0.007  | 0.001 | 2.7E-08 | 0.007              | 0.003 | 2.4E-02 |
| RP11-32K4.1                         | BHLHE22        | rs2356369     | 8:64956882   | T  | 0.52 | -0.006   | 0.001 | 2.0E-09 | -0.006 | 0.001 | 4.1E-08 | -0.007             | 0.003 | 1.6E-02 |
| ZRANB2-AS2                          | ZRANB2         | rs12031875    | 1:71585097   | A  | 0.82 | -0.008   | 0.001 | 2.2E-09 | -0.008 | 0.001 | 7.6E-08 | -0.010             | 0.004 | 8.7E-03 |
| MSANTD1, HTT                        | MSANTD1        | rs12646808    | 4:3249828    | T  | 0.66 | 0.007    | 0.001 | 2.4E-09 | 0.007  | 0.001 | 1.1E-09 | 0.002              | 0.003 | 4.7E-01 |
| TENM2                               | TENM2          | rs10078588    | 5:166816176  | A  | 0.52 | 0.006    | 0.001 | 2.5E-09 | 0.006  | 0.001 | 4.3E-08 | 0.007              | 0.003 | 1.9E-02 |
| IGSF9B                              | IGSF9B         | rs748919      | 11:133783232 | T  | 0.79 | 0.008    | 0.001 | 3.3E-09 | 0.008  | 0.001 | 1.0E-08 | 0.005              | 0.003 | 1.1E-01 |
| ACO10967.2                          | GPR75-ASB3     | rs785293      | 2:53023304   | A  | 0.57 | -0.006   | 0.001 | 3.3E-09 | -0.006 | 0.001 | 3.2E-08 | -0.006             | 0.003 | 3.8E-02 |
| BDNF, RP11-587D21.4                 | BDNF           | rs988748      | 11:27724745  | C  | 0.21 | -0.008   | 0.001 | 4.4E-09 | -0.007 | 0.001 | 1.2E-07 | -0.010             | 0.004 | 8.3E-03 |

SNP: Single Nucleotide polymorphism; LocusName: Nearest Gene; rsID\_LEAD\_SNP: RsID number of the lead SNP; CP: Chromosome/Position (build hg19/37); EA: Effect allele of the discovered SNP; EAF: Frequency of the effect allele; BETA\_comb: Effect size in meta-analysis; SE\_comb: Standard Error of the effect in meta-analysis; P\_comb: Meta-analysis P-value; BETA\_UKB: Effect size in UK Biobank analysis; SE\_UKB: Standard Error of the effect in the UK Biobank analysis; P\_UKB: UK Biobank analysis P-value; BETA\_AlcGenCHARGE+: Effect size in the AlcGen meta-analysis; SE\_AlcGenCHARGE+: Standard Error of the effect in the AlcGen meta-analysis; P\_AlcGenCHARGE+: AlcGen meta-analysis P-value
